# Supplementary material for: Aroyl chlorides as novel acyl radical precursors via visible-light photoredox catalysis
Source: Royal Society of Chemistry journal article supplement (doi:10.1039/c7qo00012j), 2017-01-01

# Supporting Information

## **Aroyl Chlorides as Novel Acyl Radical Precursors via Visible-Light Photoredox Catalysis**

**Shi-Ming Xu, Jian-Qiang Chen, Dan Liu, Yun Bao, Yong-Min Liang and Peng-Fei Xu\***

*State Key Laboratory of Applied Organic Chemistry, and College of Chemistry and Chemical Engineering,  
Lanzhou University, Lanzhou 730000, P. R. China  
xupf@lzu.edu.cn*

### **Contents**

|                                                    |            |
|----------------------------------------------------|------------|
| <b>1. General Information .....</b>                | <b>S1</b>  |
| <b>2. Optimization Studies .....</b>               | <b>S2</b>  |
| <b>3. General Procedures .....</b>                 | <b>S5</b>  |
| <b>4. Cyclic Voltammetry Experiments .....</b>     | <b>S7</b>  |
| <b>5. Luminescence Quenching Experiments .....</b> | <b>S7</b>  |
| <b>6. Reference .....</b>                          | <b>S9</b>  |
| <b>7. Characterization of Products .....</b>       | <b>S10</b> |
| <b>8. NMR Spectra .....</b>                        | <b>S20</b> |

## 1. General information

All glassware was thoroughly oven-dried. Chemicals and solvents were either purchased from commercial suppliers or purified by standard techniques. Thin-layer chromatography plates were visualized by exposure to ultraviolet light and/or staining with phosphomolybdic acid followed by heating on a hot plate. Flash chromatography was carried out using silica gel (200–300 mesh).  $^1\text{H}$  NMR and  $^{13}\text{C}$  NMR spectra were recorded on a Bruker AM-400 (400 MHz). The spectra were recorded in deuteriochloroform ( $\text{CDCl}_3$ ) as solvent at room temperature,  $^1\text{H}$  and  $^{13}\text{C}$  NMR chemical shifts are reported in ppm relative to the residual solvent peak. The residual solvent signals were used as references and the chemical shifts were converted to the TMS scale ( $\text{CDCl}_3$ :  $\delta_{\text{H}} = 7.26$  ppm,  $\delta_{\text{C}} = 77.0$  ppm). Data for  $^1\text{H}$  NMR are reported as follows: chemical shift ( $\delta$  ppm), multiplicity (s = singlet, d = doublet, t = triplet, q = quartet, m = multiplet), integration, coupling constant (Hz) and assignment. Data for  $^{13}\text{C}$  NMR are reported as chemical shift. IR spectra were recorded using Nicolet NEXUS 670 FT-IR instrument and are reported in wave numbers ( $\text{cm}^{-1}$ ). HRMS were performed on a Bruker Apex II mass instrument (ESI).

Compounds **2a-o**, **5a** and **5b** were synthesized according to the literature procedure.<sup>1, 2, 3, 4</sup>

DIPEA = ethyldiisopropylamine; DABCO = triethylenediamine; DBU = 1,8-diazabicyclo[5.4.0]undec-7-ene; DMAP = 4-dimethylaminopyridine; DMF = N,N-dimethylformamide; EA = ethyl acetate; THF = tetrahydrofuran; DCM = dichloromethane; DCE = 1,2-dichloroethane.

## 2. Optimization studies

**Table 1. Base Screening** <sup>a,b</sup>

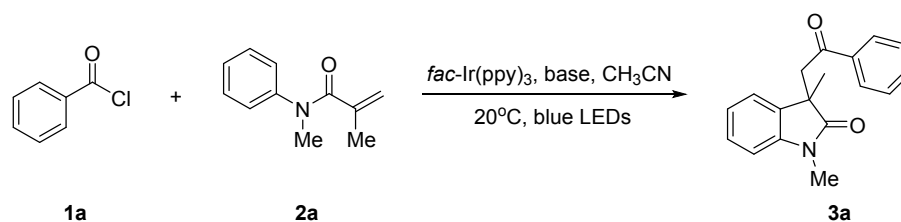

| Entry | Base                             | Yield (%) |
|-------|----------------------------------|-----------|
| 1     | 2,6-lutidine                     | 68        |
| 2     | Et <sub>3</sub> N                | 48        |
| 3     | DIPEA                            | 36        |
| 4     | DABCO                            | 32        |
| 5     | DBU                              | 0         |
| 6     | DMAP                             | 0         |
| 7     | pyridine                         | 0         |
| 8     | 2-picoline                       | 61        |
| 9     | 3-picoline                       | 0         |
| 10    | 4-picoline                       | 0         |
| 11    | 2,4,6-collidine                  | 38        |
| 12    | Na <sub>2</sub> HPO <sub>4</sub> | 59        |
| 13    | Na <sub>2</sub> CO <sub>3</sub>  | 43        |
| 14    | Cs <sub>2</sub> CO <sub>3</sub>  | 0         |

<sup>a</sup> Unless otherwise noted, reaction conditions are as follows: **2a** (0.1 mmol), **1a** (2 equiv.), *fac*-Ir(ppy)<sub>3</sub> (0.001 mmol), base (2 equiv.), CH<sub>3</sub>CN (2 mL), 25 W blue LED strip, 20 °C, 12 h, under N<sub>2</sub> atmosphere. <sup>b</sup> Isolated yield.

**Table 2. Solvent Screening** <sup>a,b</sup>

| Entry | Solvent            | Yield (%) |
|-------|--------------------|-----------|
| 1     | CH <sub>3</sub> CN | 68        |
| 2     | DMF                | 55        |
| 3     | EA                 | 58        |
| 4     | acetone            | 62        |
| 5     | THF                | 51        |
| 6     | DCM                | 49        |
| 7     | DCE                | 55        |
| 8     | toluene            | 46        |

<sup>a</sup> Unless otherwise noted, reaction conditions are as follows: **2a** (0.1 mmol), **1a** (2 equiv.), *fac*-Ir(ppy)<sub>3</sub> (0.001 mmol), 2,6-lutidine (2 equiv.), solvent (2 mL), 25 W blue LED strip, 20 °C, 12 h, under N<sub>2</sub> atmosphere. <sup>b</sup> Isolated yield.

**Table 3. Material ratio in the reaction system** <sup>a,b</sup>

| Entry            | 1a:2a:Base | Yield (%) |
|------------------|------------|-----------|
| 1                | 2:1:2      | 68        |
| 2                | 1:1:1      | 32        |
| 3                | 2:1:1      | 34        |
| 4                | 2:1:2.5    | 70        |
| 5 <sup>c</sup>   | 2:1:2.5    | 89        |
| 6 <sup>c,d</sup> | 2:1:2.5    | 95        |

<sup>a</sup> Unless otherwise noted, reaction conditions are as follows: **2a** (0.1 mmol), **1a** (2 equiv.), *fac*-Ir(ppy)<sub>3</sub> (0.001 mmol), 2,6-lutidine (2 equiv.), CH<sub>3</sub>CN (2 mL), 25 W blue LED strip, 20 °C, 12 h, under N<sub>2</sub> atmosphere. <sup>b</sup> Isolated yield. <sup>c</sup> photocatalyst (0.002 mmol). <sup>d</sup> solvent (4 mL).

**Table 4. Screening of 2-picoline** <sup>a,b</sup>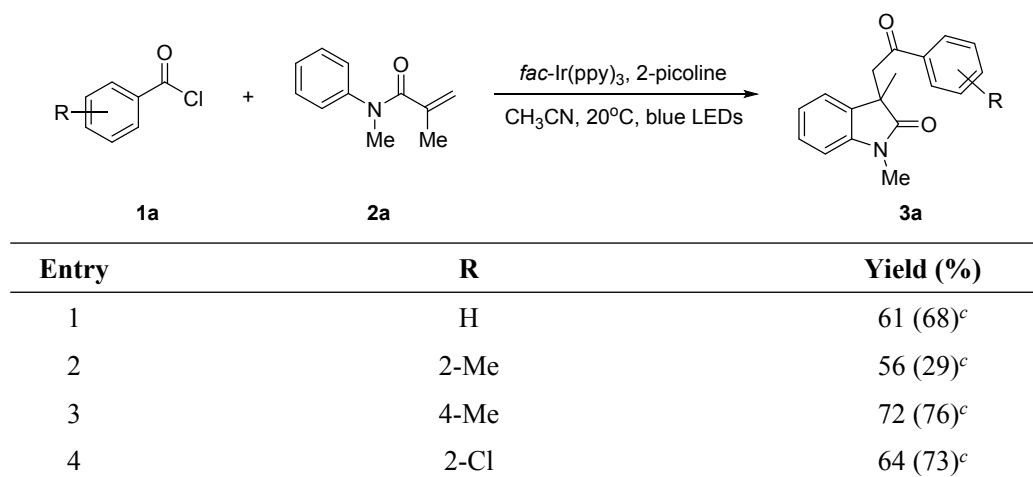

<sup>a</sup> Unless otherwise noted, reaction conditions are as follows: **2a** (0.1 mmol), **1a** (2 equiv.), *fac*-Ir(ppy)<sub>3</sub> (0.001 mmol), 2-picoline (2 equiv.), CH<sub>3</sub>CN (2 mL), 25 W blue LED strip, 20 °C, 12 h, under N<sub>2</sub> atmosphere. <sup>b</sup> Isolated yield. <sup>c</sup> Yields in the presence of 2,6-lutidine are in the brackets.

### 3. General Procedures

#### 3.1 Typical procedure for the photocatalytic reaction

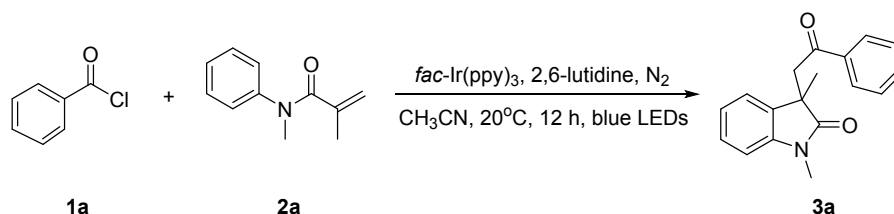

Photocatalyst *fac*-Ir(ppy)<sub>3</sub> (1.3 mg, 0.002 mmol) and N-methyl-N-phenylmethacrylamide **2a** (17.5 mg, 0.1 mmol) were added into a 10 mL vial dried before. The vial was added a Teflon coated magnetic stirring bar, anhydrous CH<sub>3</sub>CN (4 mL), 2,6-lutidine (35  $\mu$ L, 0.25 mmol) and benzoyl chloride **1a** (29  $\mu$ L, 0.2 mmol). Then the vial was sealed and degassed by three cycles of freeze-pump-thaw to exchange the internal atmosphere with nitrogen. The above reaction system was stirred vigorously in the irradiation apparatus equipped with a 25 W blue LED strip at 20 °C. After the starting material was completely consumed as monitored by TLC, the reaction mixture was concentrated under reduced pressure. The resulting crude mixture was washed with water and ethyl acetate, and the organic phase was dried over anhydrous Na<sub>2</sub>SO<sub>4</sub>. The Na<sub>2</sub>SO<sub>4</sub> was then filtered, and the crude mixture was purified by flash column chromatography on silica gel to furnish the desired product **3a** as described.

#### 3.2 Preparation of amides

Method A:

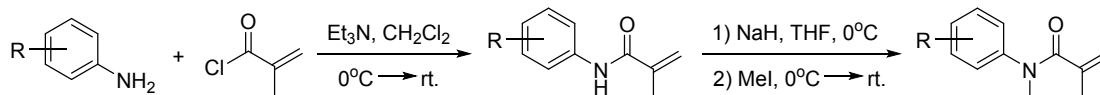

Method B:

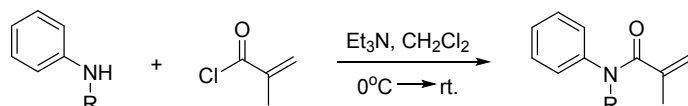

#### Method A:

Aniline (10.00 mmol, 1.0 equiv.) was dissolved in DCM (30 mL). Et<sub>3</sub>N (12.00 mmol, 1.2 equiv) was added to the reaction flask at 0 °C. Acid chloride (12.00 mmol, 1.2 equiv.) was added slowly to the mixture and the reaction was monitored by TLC. After completion of the reaction, aqueous NaHCO<sub>3</sub> (25 mL) was added. The crude product was extracted with DCM (3 x 50 mL). The combined organic layers were washed with 1M HCl (3 x 20 mL) and brine (3 x 20 mL) and dried over Na<sub>2</sub>SO<sub>4</sub>. Solvent was removed in *vacuo*. The crude product was purified by flash column chromatography.

Purified amide (8.00 mmol, 1.0 equiv.) was dissolved in THF (50 mL) at 0 °C. NaH (10.40 mmol, 1.3 equiv.) was added in three portions and the mixture was stirred for further 15 min. CH<sub>3</sub>I (32.00 mmol, 4.0 equiv.) was added slowly and the reaction mixture was stirred until completion as monitored by TLC. THF was removed in *vacuo*. Water (30 mL) was added to the mixture and the

crude product was extracted with EtOAc (3 x 40 mL). The combined organic layers were washed with brine (3 x 20 mL) and dried over Na<sub>2</sub>SO<sub>4</sub>. Solvent was removed in *vacuo*. The crude product was purified by flash column chromatography to obtain the final product.

#### Method B:

*N*-methylaniline (10.00 mmol, 1.0 equiv.) was dissolved in DCM (30 mL). Et<sub>3</sub>N (12.00 mmol, 1.2 equiv) was added to the reaction flask at 0 °C. Acid chloride (12.00 mmol, 1.2 equiv.) was added slowly to the mixture and the reaction was monitored by TLC. After completion of the reaction, aqueous NaHCO<sub>3</sub> (25 mL) was added. The crude product was extracted with DCM (3 x 50 mL). The combined organic layers were washed with 1M HCl (3 x 20 mL) and brine (3 x 20 mL), and then dried over Na<sub>2</sub>SO<sub>4</sub>. Solvent was removed in *vacuo*. The crude product was purified by flash column chromatography to obtain the final product.

All spectral data of amides are in agreement with literature values.<sup>2</sup>

### 3.3 Control experiment

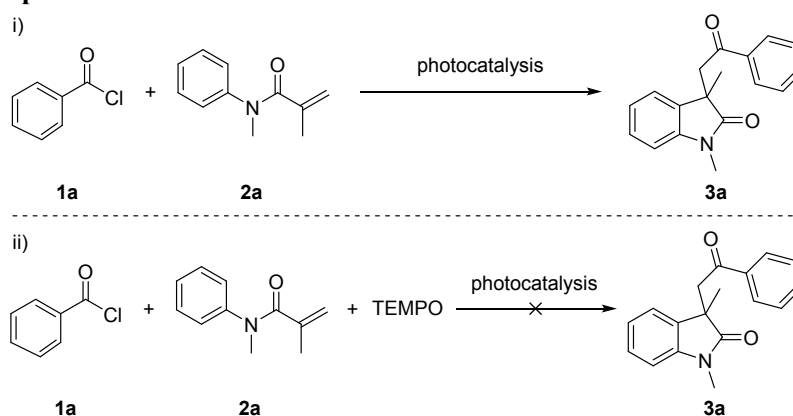

Reaction **i** was performed following the typical procedure as control experiment and reaction **ii** was added the TEMPO (0.25 mmol, 2.5 equiv.) before the vial was sealed and degassed. After 12 hours, the two reaction mixtures were purified by flash column chromatography on silica gel. The results showed that reaction in the presence of TEMPO cannot afford any product **3a**. Since TEMPO is usually served as radical trapping agent to block radical reactions, the existence of acyl radicals is confirmed.

## 4. Cyclic Voltammetry Experiments

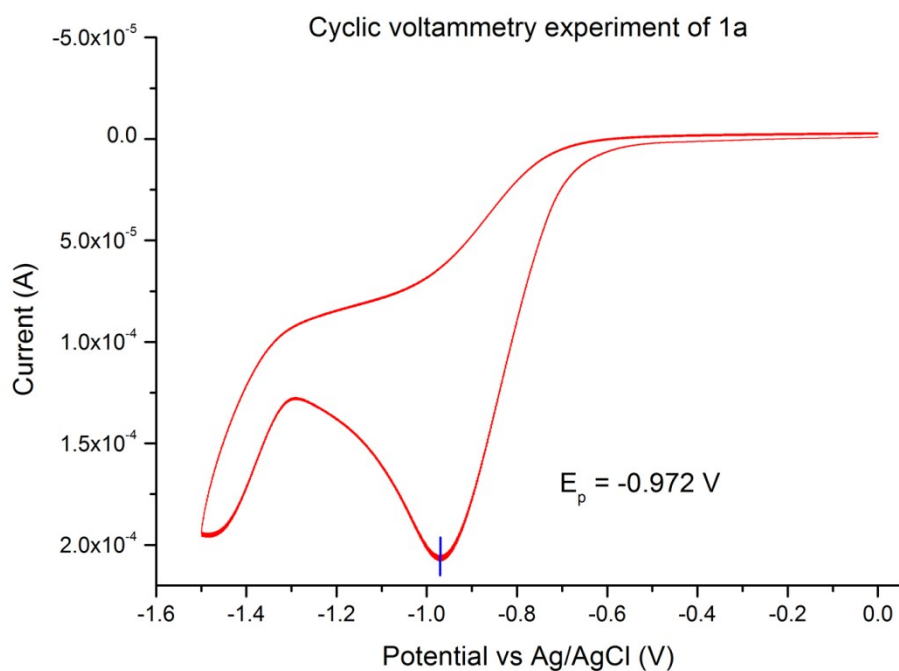

**Figure 1.** Reduction potential measurement of benzoyl chloride **1a**

Determination of the reduction potential<sup>5</sup> of **1a** was performed by cyclic voltammetry using a CHI660D potentiostat. The electrochemical measurements were made using a polished glassy carbon electrode ( $\varnothing = 2$  mm) as the working electrode, platinum mesh as counter electrode and a double junction Ag/AgCl (0.1 M AgNO<sub>3</sub>) as reference electrode. Measurements of **1a** (0.01M) were performed in 0.1 M of Bu<sub>4</sub>NBF<sub>4</sub>/CH<sub>3</sub>CN with a sweep rate of 100 mV/s under anhydrous and anaerobic conditions.

The reduction potential of benzoyl chloride **1a** is -1.14 V vs SCE according to the literature value<sup>6</sup>. Converting reduction potential measured with Ag/AgCl to the one with saturated calomel electrode (SCE) needs reducing 45.9 mV. So the experiment result ( $E_p = -1.018$  V vs SCE) is within the measurement uncertainty ( $\pm 150$  mV).

The result suggested that the excited photocatalyst \*Ir<sup>III</sup>(ppy)<sub>3</sub> ( $E_{1/2}^{IV/*III} = -1.73$  V vs SCE in CH<sub>3</sub>CN) is sufficient to reduce the benzoyl chloride **1a** ( $E_p = -0.972$  V vs Ag/AgCl) to generate the acyl radical intermediate.

## 5. Luminescence Quenching Experiments

Emission intensities were recorded using a Perkin Elmer LS55 spectrofluorimeter. All *fac*-Ir(ppy)<sub>3</sub> solutions were excited at 375 nm and the emission intensity at 520 nm was observed. In a typical experiment, the emission spectrum of a  $5 \times 10^{-5}$  M solution of *fac*-Ir(ppy)<sub>3</sub> and different concentration (0.005~0.025 M) of benzoyl chloride **1a**, *N*-methyl-*N*-phenylmethacrylamide **2a** and 2,6-lutidine in anhydrous CH<sub>3</sub>CN in 10 mm path length quartz cuvette was collected.



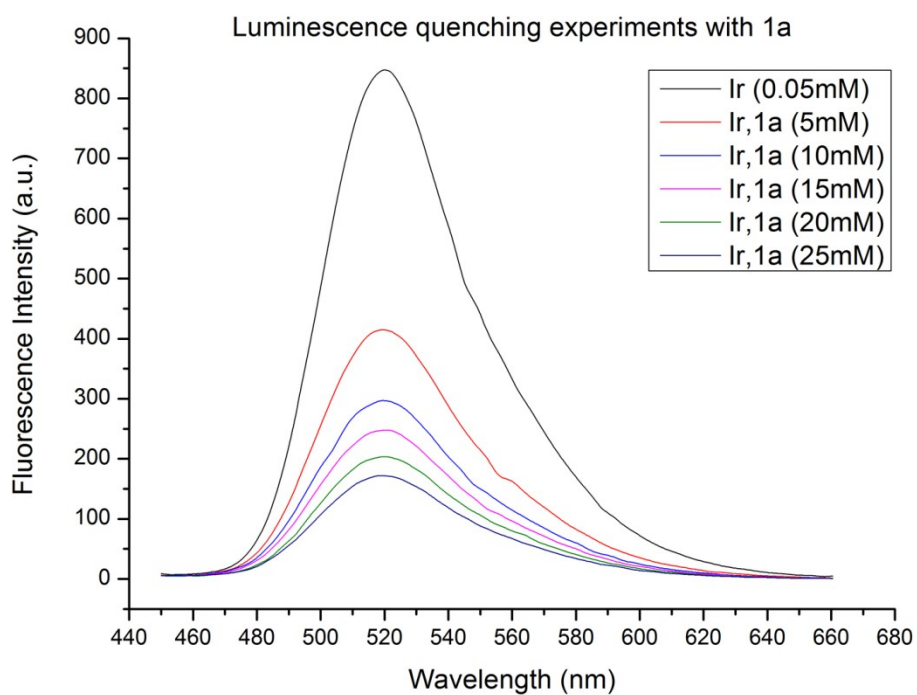

**Figure 2.** Luminescence quenching experiments of *fac*-Ir(ppy)<sub>3</sub> with **1a**

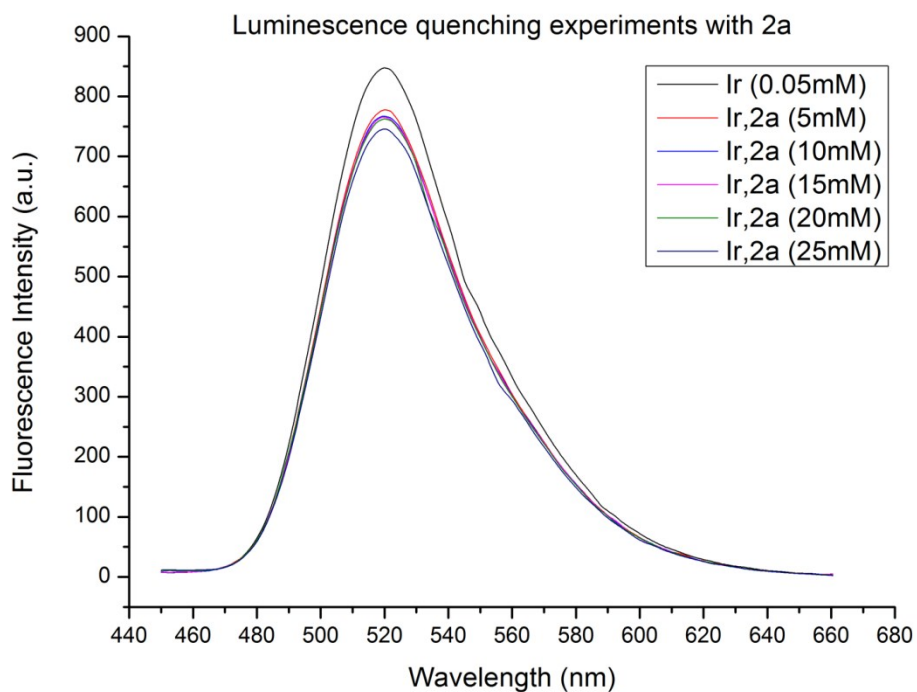

**Figure 3.** Luminescence quenching experiments of *fac*-Ir(ppy)<sub>3</sub> with **2a**

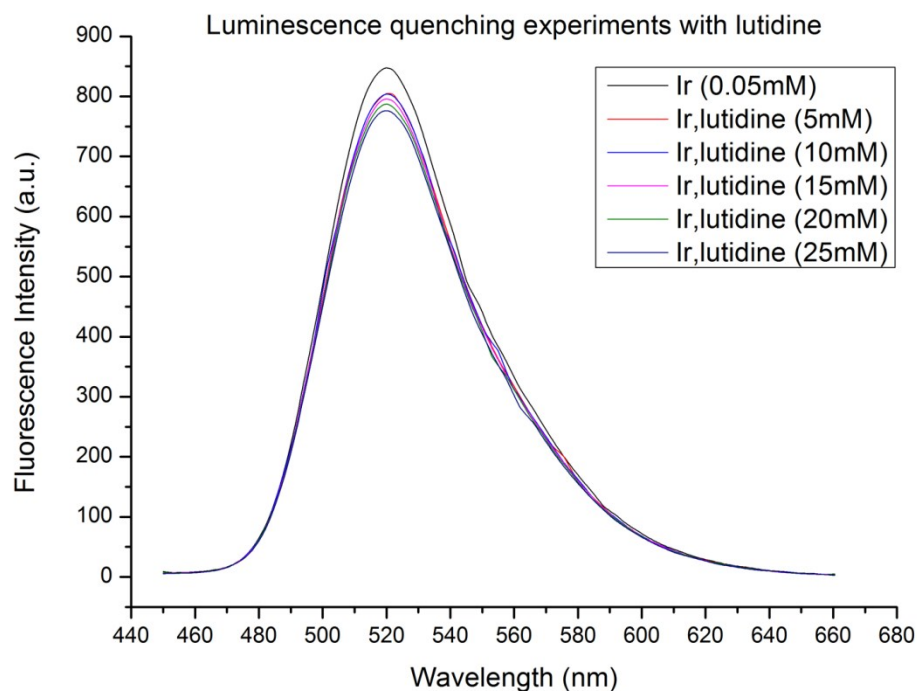

**Figure 4.** Luminescence quenching experiments of *fac*-Ir(ppy)<sub>3</sub> with 2,6-lutidine

As shown in Figure 2, the emission intensity of the excited photocatalyst *fac*-Ir(ppy)<sub>3</sub> is decreased in the presence of benzoyl chloride **1a**. From Figure 3 and Figure 4, we know that 2,6-lutidine and *N*-methyl-*N*-phenylmethacrylamide **2a** are unable to quench the excited photocatalyst. So benzoyl chloride **1a** is the only molecular entity in the reaction mixture served as the oxidative quencher of the excited photocatalyst.

## 6. Reference

- (1) C.-C. Li and S.-D. Yang, *Org. Lett.*, 2015, **17**, 2142.
- (2) L.-W. Zheng, H.-L. Huang, C. Yang and W.-J. Xia, *Org. Lett.*, 2015, **17**, 1034.
- (3) Z. He, M. Bae, J. Wu and T. F. Jamison, *Angew. Chem., Int. Ed.*, 2014, **53**, 14451.
- (4) F. Gao, C. Yang, G.-L. L.-W. Gao, Zheng and W.-J. Xia, *Org. Lett.*, 2015, **17**, 3478.
- (5) D. Occhialini, K. Daasbjerg and H. Lund, *Acta. Chem. Scand.*, 1993, **47**, 1100.
- (6) X.-Q. Hu, X.-T. Qi, J.-R. Chen, Q.-Q. Zhao, Q. Wei, Y. Lan and W.-J. Xiao, *Nat. Commun.*, 2016, **7**, 11188.
- (7) G. Bergonzini, C. Cassani and C.-J. Wallentin, *Angew. Chem., Int. Ed.*, 2015, **54**, 14066.

## 7. Characterization of Products

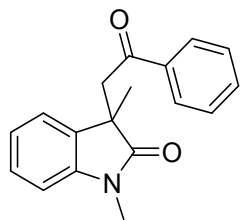

### 1,3-dimethyl-3-(2-oxo-2-phenylethyl)indolin-2-one (3a)

Colorless oil; 26.6 mg, 95% yield.  $^1\text{H NMR}$  (400 MHz,  $\text{CDCl}_3$ ): 7.84-7.82 (m, 2H), 7.51 (t,  $J = 7.6$  Hz, 1H), 7.39 (t,  $J = 7.6$  Hz, 2H), 7.25 (td,  $J_t = 7.6$  Hz,  $J_d = 0.9$  Hz, 1H), 7.14 (d,  $J = 7.1$  Hz, 1H), 6.97 (t,  $J = 7.4$  Hz, 1H), 6.89 (d,  $J = 7.8$  Hz, 1H), 3.72 (d,  $J = 17.9$  Hz, 1H), 3.65 (d,  $J = 17.9$  Hz, 1H), 3.31 (s, 3H), 1.44 (s, 3H);  $^{13}\text{C NMR}$  (100 MHz,  $\text{CDCl}_3$ ): 196.1, 180.5, 143.8, 136.4, 133.7, 133.1, 128.4, 127.9, 127.8, 122.1, 121.7, 108.1, 46.0, 45.2, 26.4, 24.9. **IR** (KBr): 3431, 3057, 2965, 2925, 1711, 1689, 1614, 1470, 1449, 1378, 1350, 1248, 1215, 1125, 753, 690  $\text{cm}^{-1}$ . **HRMS** (ESI) for  $\text{C}_{18}\text{H}_{18}\text{NO}_2$   $[\text{M}+\text{H}]^+$  calcd 280.1332, found 280.1330.

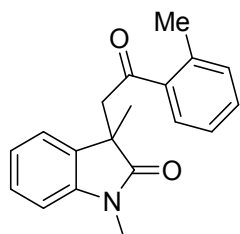

### 1,3-dimethyl-3-(2-oxo-2-(o-tolyl)ethyl)indolin-2-one (3b)

Colorless oil; 16.5 mg, 56% yield.  $^1\text{H NMR}$  (400 MHz,  $\text{CDCl}_3$ ): 7.51-7.48 (m, 1H), 7.32-7.23 (m, 2H), 7.20 (d,  $J = 7.6$  Hz, 1H), 7.16 (dd,  $J_d = 7.4$  Hz,  $J_d = 0.7$  Hz, 1H), 7.11 (d,  $J = 7.6$  Hz, 1H), 6.99 (td,  $J_t = 7.4$  Hz,  $J_d = 0.9$  Hz, 1H), 6.84 (d,  $J = 7.8$  Hz, 1H), 3.61 (d,  $J = 17.0$  Hz, 1H), 3.51 (d,  $J = 17.0$  Hz, 1H), 3.21 (s, 3H), 2.10 (s, 3H), 1.41 (s, 3H);  $^{13}\text{C NMR}$  (100 MHz,  $\text{CDCl}_3$ ): 200.7, 180.3, 143.8, 137.8, 133.4, 131.6, 131.1, 128.2, 127.9, 126.5, 125.4, 122.2, 122.1, 108.1, 49.1, 45.8, 26.4, 24.9, 20.5. **IR** (KBr): 3436, 3063, 2965, 2927, 1783, 1719, 1652, 1626, 1595, 1494, 1457, 1367, 1201, 1124, 996, 769, 742, 700  $\text{cm}^{-1}$ . **HRMS** (ESI) for  $\text{C}_{19}\text{H}_{20}\text{NO}_2$   $[\text{M}+\text{H}]^+$  calcd 294.1489, found 280.1488.

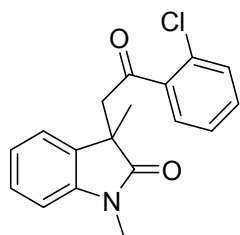

### 3-(2-(2-chlorophenyl)-2-oxoethyl)-1,3-dimethylindolin-2-one (3c)

Colorless oil; 22.8 mg, 73% yield.  $^1\text{H NMR}$  (400 MHz,  $\text{CDCl}_3$ ): 7.3-7.24 (m, 3H), 7.23-7.15 (m, 3H), 7.00 (td,  $J_t = 7.2$  Hz,  $J_d = 0.8$  Hz, 1H), 6.86 (d,  $J = 7.6$  Hz, 1H), 3.68 (d,  $J = 17.6$  Hz, 1H), 3.60 (d,  $J = 17.6$  Hz, 1H), 3.26 (s, 3H), 1.41 (s, 3H);  $^{13}\text{C NMR}$  (100 MHz,  $\text{CDCl}_3$ ): 199.4, 180.0, 143.8, 138.7, 133.0, 131.7, 130.8, 130.3, 129.0, 128.0, 126.8, 122.2, 108.2, 50.1, 45.8, 26.4, 24.7. **IR** (KBr): 3449, 3057, 2966, 2927, 1710, 1690, 1614, 1494, 1471, 1379, 1350, 1267, 1250, 1126, 941, 754, 737  $\text{cm}^{-1}$ . **HRMS** (ESI) for  $\text{C}_{18}\text{H}_{17}\text{ClNO}_2$   $[\text{M}+\text{H}]^+$  calcd 314.0942, found 314.0944.

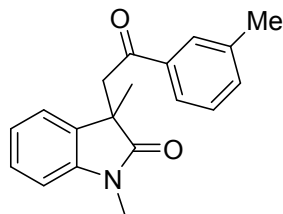

### 1,3-dimethyl-3-(2-oxo-2-(m-tolyl)ethyl)indolin-2-one (3d)

Colorless oil; 22.8 mg, 78% yield.  $^1\text{H NMR}$  (400 MHz,  $\text{CDCl}_3$ ): 7.64-7.63 (m, 2H), 7.34-7.32 (m, 1H), 7.30-7.28 (m, 1H), 7.25 (td,  $J_t = 7.6$  Hz,  $J_d = 0.8$  Hz, 1H), 7.13 (d,  $J = 7.0$  Hz, 1H), 6.97 (t,  $J = 7.6$  Hz, 1H), 6.89 (d,  $J = 7.8$  Hz, 1H), 3.71 (d,  $J = 17.9$  Hz, 1H), 3.63 (d,  $J = 17.9$  Hz, 1H), 3.31 (s, 3H), 2.35 (s, 3H), 1.44 (s, 3H);  $^{13}\text{C NMR}$  (100 MHz,  $\text{CDCl}_3$ ): 196.3, 180.6, 143.9, 138.3, 136.4, 133.9, 133.8, 129.2, 128.5, 128.3, 127.8, 126.9, 126.5, 125.2, 122.1, 121.7, 108.1, 46.1, 45.3, 26.4, 24.9, 21.2. **IR** (KBr): 3473, 3055, 2967, 2926, 1713, 1687, 1614, 1494, 1471, 1379, 1349, 1252, 1125, 914, 776, 754, 734  $\text{cm}^{-1}$ . **HRMS** (ESI) for  $\text{C}_{19}\text{H}_{20}\text{NO}_2$   $[\text{M}+\text{H}]^+$  calcd 294.1489, found 280.1491.

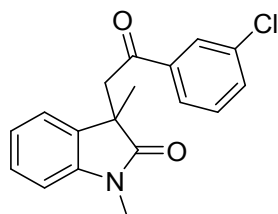

### 3-(2-(3-chlorophenyl)-2-oxoethyl)-1,3-dimethylindolin-2-one (3e)

Colorless oil; 20.8 mg, 66% yield.  $^1\text{H NMR}$  (400 MHz,  $\text{CDCl}_3$ ): 7.79 (t,  $J = 2.0$  Hz, 1H), 7.71 (dt,  $J_d = 8.0$  Hz,  $J_t = 1.2$  Hz, 1H), 7.50-7.47 (m, 1H), 7.34 (t,  $J = 8.0$  Hz, 1H), 7.26 (td,  $J_t = 8.4$  Hz,  $J_d = 1.2$  Hz, 1H), 7.13 (dd,  $J_d = 7.2$  Hz,  $J_d = 0.8$  Hz, 1H), 6.98 (td,  $J_t = 7.6$  Hz,  $J_d = 0.8$  Hz, 1H), 6.90 (d,  $J = 7.6$  Hz, 1H), 3.67 (d,  $J = 18.0$  Hz, 1H), 3.61 (d,  $J = 18.0$  Hz, 1H), 3.31 (s, 3H), 1.44 (s, 3H);  $^{13}\text{C NMR}$  (100 MHz,  $\text{CDCl}_3$ ): 194.9, 180.3, 143.8, 137.8, 134.8, 133.4, 133.1, 129.8, 128.1, 127.9, 126.0, 122.2, 108.2, 46.1, 45.2, 26.4, 24.8. **IR** (KBr): 3432, 3058, 2971, 2927, 1709, 1691, 1615, 1495, 1471, 1380, 1351, 1265, 1210, 1125, 909, 766, 736, 702  $\text{cm}^{-1}$ . **HRMS** (ESI) for  $\text{C}_{18}\text{H}_{17}\text{ClNO}_2$   $[\text{M}+\text{H}]^+$  calcd 314.0942, found 314.0942.

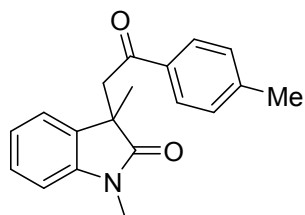

### 1,3-dimethyl-3-(2-oxo-2-(p-tolyl)ethyl)indolin-2-one (3f)

Colorless oil; 22.2 mg, 76% yield.  $^1\text{H NMR}$  (400 MHz,  $\text{CDCl}_3$ ): 7.74-7.72 (m, 2H), 7.24 (td,  $J_t = 7.6$  Hz,  $J_d = 1.2$  Hz, 1H), 7.19-7.17 (m, 2H), 7.13 (d,  $J = 6.8$  Hz, 1H), 6.98-6.94 (m, 1H), 6.89 (d,  $J = 7.6$  Hz, 1H), 3.70 (d,  $J = 18.0$  Hz, 1H), 3.61 (d,  $J = 18.0$  Hz, 1H), 3.31 (s, 3H), 2.37 (s, 3H), 1.43 (s, 3H);  $^{13}\text{C NMR}$  (100 MHz,  $\text{CDCl}_3$ ): 195.7, 180.6, 143.9, 143.8, 133.9, 133.8, 129.1, 128.0, 127.8, 122.1, 121.7, 108.1, 45.9, 45.3, 26.4, 24.9, 21.6. **IR** (KBr): 3456, 3055, 2966, 2926, 1712, 1686, 1613, 1494, 1471, 1379, 1350, 1249, 1183, 1125, 818, 754, 736  $\text{cm}^{-1}$ . **HRMS** (ESI) for  $\text{C}_{19}\text{H}_{20}\text{NO}_2$   $[\text{M}+\text{H}]^+$  calcd 294.1489, found 280.1491.

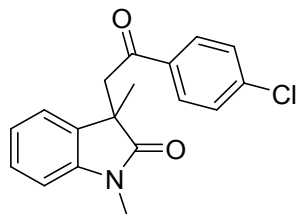

### 3-(2-(4-chlorophenyl)-2-oxoethyl)-1,3-dimethylindolin-2-one (3g)

Colorless oil; 19.1 mg, 61% yield.  $^1\text{H NMR}$  (400 MHz,  $\text{CDCl}_3$ ): 7.78-7.75 (m, 2H), 7.38-7.35 (m, 2H), 7.26 (td,  $J_t = 7.6$  Hz,  $J_d = 1.2$  Hz, 1H), 7.13 (dd,  $J_d = 7.2$  Hz,  $J_d = 0.8$  Hz, 1H), 6.98 (td,  $J_t = 7.6$  Hz,  $J_d = 0.8$  Hz, 1H), 6.90 (d,  $J = 7.6$  Hz, 1H), 3.66 (d,  $J = 18.0$  Hz, 1H), 3.61 (d,  $J = 18.0$  Hz, 1H), 3.30 (s, 3H), 1.43 (s, 3H);  $^{13}\text{C NMR}$  (100 MHz,  $\text{CDCl}_3$ ): 194.9, 180.4, 143.8, 139.6, 134.6, 133.5, 129.4, 128.8, 127.9, 122.2, 121.7, 108.2, 45.9, 45.2, 26.4, 24.9. **IR** (KBr): 3407, 3056, 2966, 2926, 1711, 1690, 1614, 1587, 1494, 1471, 1379, 1351, 1250, 1213, 1126, 1092, 837, 754, 741  $\text{cm}^{-1}$ . **HRMS** (ESI) for  $\text{C}_{18}\text{H}_{17}\text{ClNO}_2$   $[\text{M}+\text{H}]^+$  calcd 314.0942, found 314.0942.

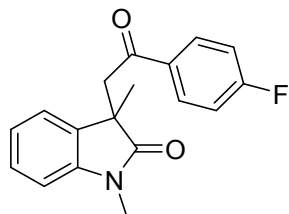

### 3-(2-(4-fluorophenyl)-2-oxoethyl)-1,3-dimethylindolin-2-one (3h)

Colorless oil; 19.4 mg, 65% yield.  $^1\text{H NMR}$  (400 MHz,  $\text{CDCl}_3$ ): 7.88-7.83 (m, 2H), 7.26 (td,  $J_t = 8.0$  Hz,  $J_d = 1.2$  Hz, 1H), 7.14-7.12 (m, 2H), 7.09-7.03 (m, 1H), 6.98 (td,  $J_t = 7.6$  Hz,  $J_d = 0.8$  Hz, 1H), 6.90 (d,  $J = 7.6$  Hz, 1H), 3.67 (d,  $J = 17.6$  Hz, 1H), 3.62 (d,  $J = 17.6$  Hz, 1H), 3.31 (s, 3H), 1.44 (s, 3H);  $^{13}\text{C NMR}$  (100 MHz,  $\text{CDCl}_3$ ): 194.5, 180.5, 165.7 (d,  $J = 254$  Hz), 143.8, 133.6, 132.9, 132.8 (d,  $J = 3$  Hz), 130.7, 130.6, 127.9, 122.2, 121.7, 115.6 (d,  $J = 22$  Hz), 108.2, 45.9, 45.3, 26.4, 24.9. **IR** (KBr): 3443, 3059, 2968, 2927, 1711, 1690, 1614, 1598, 1495, 1471, 1380, 1351, 1228, 1157, 1126, 840, 754, 737  $\text{cm}^{-1}$ . **HRMS** (ESI) for  $\text{C}_{18}\text{H}_{17}\text{FNO}_2$   $[\text{M}+\text{H}]^+$  calcd 298.1238, found 298.1239.

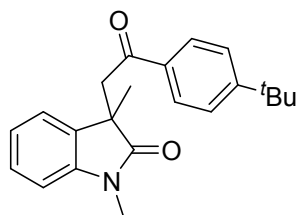

### 3-(2-(4-(tert-butyl)phenyl)-2-oxoethyl)-1,3-dimethylindolin-2-one (3i)

Colorless oil; 27.5 mg, 82% yield.  $^1\text{H NMR}$  (400 MHz,  $\text{CDCl}_3$ ): 7.78-7.76 (m, 2H), 7.41-7.39 (m, 2H), 7.24 (td,  $J_t = 7.6$  Hz,  $J_d = 1.2$  Hz, 1H), 7.13-7.11 (m, 1H), 6.96 (t,  $J = 7.4$  Hz, 1H), 6.89 (d,  $J = 7.8$  Hz, 1H), 3.71 (d,  $J = 18.0$  Hz, 1H), 3.62 (d,  $J = 18.0$  Hz, 1H), 3.31 (s, 3H), 1.43 (s, 3H), 1.30 (s, 9H);  $^{13}\text{C NMR}$  (100 MHz,  $\text{CDCl}_3$ ): 195.7, 180.6, 156.8, 143.8, 133.8, 133.8, 127.8, 127.7, 125.4, 122.0, 121.7, 108.1, 45.9, 45.2, 35.0, 31.0, 26.4, 24.9. **IR** (KBr): 3429, 3056, 2965, 2927, 1711, 1689, 1608, 1494, 1471, 1380, 1351, 1249, 1181, 1125, 846, 753, 741  $\text{cm}^{-1}$ . **HRMS** (ESI) for  $\text{C}_{22}\text{H}_{26}\text{NO}_2$   $[\text{M}+\text{H}]^+$  calcd 336.1958, found 336.1960.

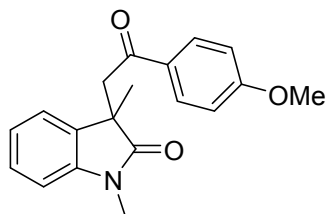

### 3-(2-(4-methoxyphenyl)-2-oxoethyl)-1,3-dimethylindolin-2-one (3j)

Colorless oil; 22.3 mg, 72% yield.  $^1\text{H NMR}$  (400 MHz,  $\text{CDCl}_3$ ): 7.84-7.80 (m, 2H), 7.27-7.23 (m, 1H), 7.14-7.12 (m, 1H), 6.96 (td,  $J_t = 7.6$  Hz,  $J_d = 0.9$  Hz, 1H), 6.90-6.84 (m, 3H), 3.83 (s, 3H), 3.68 (d,  $J = 17.7$  Hz, 1H), 3.60 (d,  $J = 17.7$  Hz, 1H), 3.31 (s, 3H), 1.43 (s, 3H);  $^{13}\text{C NMR}$  (100 MHz,  $\text{CDCl}_3$ ): 194.6, 180.7, 163.5, 143.8, 133.9, 130.2, 129.5, 127.7, 122.1, 121.7, 113.6, 108.1, 55.4, 45.6, 45.3, 26.4, 24.9. **IR** (KBr): 3412, 3056, 2966, 2929, 2248, 1708, 1681, 1602, 1495, 1470, 1379, 1351, 1250, 1171, 1125, 910, 839, 754, 743  $\text{cm}^{-1}$ . **HRMS** (ESI) for  $\text{C}_{19}\text{H}_{20}\text{NO}_3$   $[\text{M}+\text{H}]^+$  calcd 310.1473, found 310.1475.

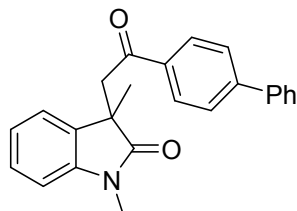

### 3-(2-([1,1'-biphenyl]-4-yl)-2-oxoethyl)-1,3-dimethylindolin-2-one (3k)

Colorless oil; 18.4 mg, 52% yield.  $^1\text{H NMR}$  (400 MHz,  $\text{CDCl}_3$ ): 7.91-7.89 (m, 2H), 7.62-7.57 (m, 4H), 7.47-7.43 (m, 2H), 7.40-7.36 (m, 1H), 7.28-7.23 (m, 1H), 7.15 (dd,  $J_d = 7.2$  Hz,  $J_d = 0.4$  Hz, 1H), 6.98 (td,  $J_t = 7.6$  Hz,  $J_d = 0.8$  Hz, 1H), 6.90 (d,  $J = 7.8$  Hz, 1H), 3.75 (d,  $J = 17.8$  Hz, 1H), 3.68 (d,  $J = 17.8$  Hz, 1H), 3.32 (s, 3H), 1.46 (s, 3H);  $^{13}\text{C NMR}$  (100 MHz,  $\text{CDCl}_3$ ): 195.7, 180.6, 145.8, 143.8, 139.7, 135.1, 133.7, 128.9, 128.6, 128.2, 127.8, 127.2, 127.1, 122.2, 121.8, 108.2, 46.4, 45.3, 26.5, 24.9. **IR** (KBr): 3416, 3056, 2966, 2926, 1712, 1686, 1613, 1494, 1471, 1379, 1351, 1250, 1220, 1125, 1006, 847, 764, 753, 736, 699  $\text{cm}^{-1}$ . **HRMS** (ESI) for  $\text{C}_{24}\text{H}_{22}\text{NO}_2$   $[\text{M}+\text{H}]^+$  calcd 356.1645, found 356.1646.

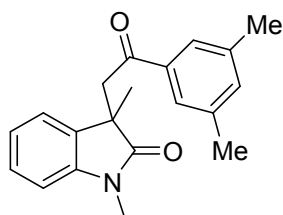

### 3-(2-(3,5-dimethylphenyl)-2-oxoethyl)-1,3-dimethylindolin-2-one (3l)

Colorless oil; 25.9 mg, 83% yield.  $^1\text{H NMR}$  (400 MHz,  $\text{CDCl}_3$ ): 7.44 (s, 2H), 7.26-7.22 (m, 1H), 7.14-7.12 (m, 2H), 6.96 (td,  $J_t = 7.6$  Hz,  $J_d = 0.6$  Hz, 1H), 6.89 (d,  $J = 7.8$  Hz, 1H), 3.70 (d,  $J = 17.9$  Hz, 1H), 3.60 (d,  $J = 17.9$  Hz, 1H), 3.31 (s, 3H), 2.31 (s, 6H), 1.43 (s, 3H);  $^{13}\text{C NMR}$  (100 MHz,  $\text{CDCl}_3$ ): 196.4, 180.6, 143.9, 138.1, 136.4, 134.7, 133.8, 127.7, 125.7, 122.1, 121.7, 108.0, 46.1, 45.2, 26.4, 24.8, 21.1. **IR** (KBr): 3450, 3054, 2966, 2924, 1713, 1688, 1614, 1495, 1471, 1380, 1350, 1249, 1183, 1125, 855, 754, 741  $\text{cm}^{-1}$ . **HRMS** (ESI) for  $\text{C}_{19}\text{H}_{20}\text{NO}_2$   $[\text{M}+\text{H}]^+$  calcd 308.1645, found 308.1643.

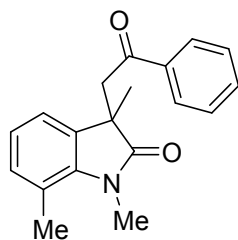

**1,3,7-trimethyl-3-(2-oxo-2-phenylethyl)indolin-2-one (3m)**

Colorless oil; 16.2 mg, 55% yield.  $^1\text{H NMR}$  (400 MHz,  $\text{CDCl}_3$ ): 7.84-7.82 (m, 2H), 7.53-7.49 (m, 1H), 7.39 (t,  $J = 7.5$  Hz, 2H), 6.95 (t,  $J = 7.6$  Hz, 2H), 6.85 (t,  $J = 7.5$  Hz, 1H), 3.69 (d,  $J = 17.9$  Hz, 1H), 3.64 (d,  $J = 17.9$  Hz, 1H), 3.58 (s, 3H), 2.62 (s, 3H), 1.40 (s, 3H);  $^{13}\text{C NMR}$  (100 MHz,  $\text{CDCl}_3$ ): 196.2, 181.4, 141.6, 136.4, 134.4, 133.1, 128.4, 127.9, 122.0, 119.7, 119.5, 46.3, 44.6, 29.8, 25.5, 19.1. **IR** (KBr): 3449, 3058, 2970, 2927, 1710, 1690, 1601, 1461, 1449, 1373, 1244, 1217, 1127, 778, 747, 712, 691  $\text{cm}^{-1}$ . **HRMS** (ESI) for  $\text{C}_{19}\text{H}_{20}\text{NO}_2$   $[\text{M}+\text{H}]^+$  calcd 294.1489, found 294.1488.

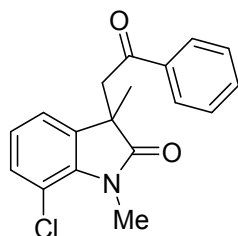

**7-chloro-1,3-dimethyl-3-(2-oxo-2-phenylethyl)indolin-2-one (3n)**

Colorless oil; 23.3 mg, 74% yield.  $^1\text{H NMR}$  (400 MHz,  $\text{CDCl}_3$ ): 7.84-7.82 (m, 2H), 7.53 (t,  $J = 7.4$  Hz, 1H), 7.41 (t,  $J = 7.8$  Hz, 2H), 7.16 (dd,  $J_d = 8.2$  Hz,  $J_d = 0.9$  Hz, 1H), 6.98 (dd,  $J_d = 7.2$  Hz,  $J_d = 0.8$  Hz, 1H), 6.87 (t,  $J = 8.0$  Hz, 1H), 3.69 (s, 2H), 3.68 (s, 3H), 1.41 (s, 3H);  $^{13}\text{C NMR}$  (100 MHz,  $\text{CDCl}_3$ ): 195.9, 180.9, 139.8, 136.7, 136.1, 133.3, 130.2, 128.5, 127.9, 122.9, 120.0, 115.6, 46.4, 45.0, 29.8, 25.3. **IR** (KBr): 3421, 3063, 2969, 2927, 1718, 1689, 1609, 1468, 1450, 1367, 1352, 1217, 1125, 1065, 774, 754, 736, 690  $\text{cm}^{-1}$ . **HRMS** (ESI) for  $\text{C}_{18}\text{H}_{17}\text{ClNO}_2$   $[\text{M}+\text{H}]^+$  calcd 314.0942, found 314.0943.

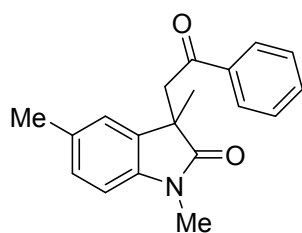

**1,3,5-trimethyl-3-(2-oxo-2-phenylethyl)indolin-2-one (3o)**

Colorless oil; 25.4 mg, 87% yield.  $^1\text{H NMR}$  (400 MHz,  $\text{CDCl}_3$ ): 7.85-7.83 (m, 2H), 7.53-7.49 (m, 1H), 7.39 (t,  $J = 7.5$  Hz, 2H), 7.04 (dd,  $J_d = 7.9$  Hz,  $J_d = 0.8$  Hz, 2H), 6.95 (s, 1H), 6.78 (d,  $J = 7.8$  Hz, 1H), 3.69 (d,  $J = 17.9$  Hz, 1H), 3.63 (d,  $J = 17.9$  Hz, 1H), 3.29 (s, 3H), 2.27 (s, 3H), 1.43 (s, 3H);  $^{13}\text{C NMR}$  (100 MHz,  $\text{CDCl}_3$ ): 196.1, 180.5, 141.4, 136.4, 133.7, 133.1, 131.5, 128.4, 128.0, 128.0, 122.7, 107.8, 46.0, 45.3, 26.4, 25.0, 21.1. **IR** (KBr): 3409, 3059, 2966, 2925, 1711, 1690, 1621, 1600, 1502, 1449, 1352, 1247, 1217, 875, 807, 762, 690  $\text{cm}^{-1}$ . **HRMS** (ESI) for  $\text{C}_{19}\text{H}_{20}\text{NO}_2$   $[\text{M}+\text{H}]^+$  calcd 294.1489, found 294.1491.

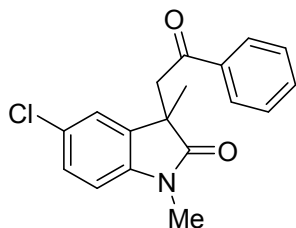

**5-chloro-1,3-dimethyl-3-(2-oxo-2-phenylethyl)indolin-2-one (3p)**

Colorless oil; 25.6 mg, 82% yield. <sup>1</sup>H NMR (400 MHz, CDCl<sub>3</sub>): 7.85-7.83 (m, 2H), 7.53 (t, *J* = 7.6 Hz, 1H), 7.41 (t, *J* = 7.9 Hz, 2H), 7.23 (dd, *J*<sub>d</sub> = 8.4 Hz, *J*<sub>d</sub> = 2.0 Hz, 1H), 7.10 (d, *J* = 2.0 Hz, 1H), 6.82 (d, *J* = 8.3 Hz, 1H), 3.69 (s, 2H), 3.30 (s, 3H), 1.43 (s, 3H); <sup>13</sup>C NMR (100 MHz, CDCl<sub>3</sub>): 195.8, 180.1, 142.5, 136.1, 135.6, 133.4, 128.6, 128.0, 127.7, 127.5, 122.3, 109.0, 46.1, 45.4, 26.6, 24.8. IR (KBr): 3443, 3061, 2970, 2928, 1718, 1690, 1611, 1492, 1450, 1349, 1245, 1216, 1130, 1048, 878, 811, 740, 690 cm<sup>-1</sup>. HRMS (ESI) for C<sub>18</sub>H<sub>17</sub>ClNO<sub>2</sub> [M+H]<sup>+</sup> calcd 314.0942, found 314.0941.

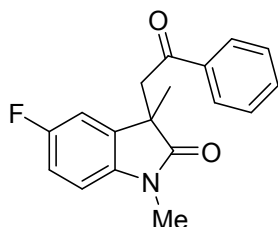

**5-fluoro-1,3-dimethyl-3-(2-oxo-2-phenylethyl)indolin-2-one (3q)**

Colorless oil; 24.2 mg, 81% yield. <sup>1</sup>H NMR (400 MHz, CDCl<sub>3</sub>): 7.85-7.83 (m, 2H), 7.55-7.51 (m, 1H), 7.40 (t, *J* = 7.9 Hz, 2H), 6.97-6.92 (m, 1H), 6.90 (dd, *J*<sub>d</sub> = 7.9 Hz, *J*<sub>d</sub> = 2.5 Hz, 1H), 6.81 (dd, *J*<sub>d</sub> = 8.5 Hz, *J*<sub>d</sub> = 4.2 Hz, 1H), 3.67 (s, 2H), 3.30 (s, 3H), 1.43 (s, 3H); <sup>13</sup>C NMR (100 MHz, CDCl<sub>3</sub>): 195.9, 180.2, 159.1 (d, *J* = 238 Hz), 139.8, 136.2, 135.4 (d, *J* = 8.0 Hz), 133.3, 130.1, 128.5, 113.8 (d, *J* = 23 Hz), 110.1 (d, *J* = 24 Hz), 108.5 (d, *J* = 8 Hz), 45.9, 45.7, 26.6, 24.8. IR (KBr): 3420, 3062, 2969, 2929, 1713, 1690, 1618, 1498, 1469, 1449, 1353, 1281, 1245, 1218, 1118, 877, 810, 763, 690 cm<sup>-1</sup>. HRMS (ESI) for C<sub>18</sub>H<sub>17</sub>FNO<sub>2</sub> [M+H]<sup>+</sup> calcd 298.1238, found 298.1236.

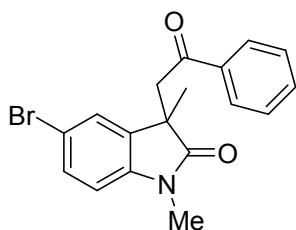

**5-bromo-1,3-dimethyl-3-(2-oxo-2-phenylethyl)indolin-2-one (3r)**

Colorless oil; 29.2 mg, 82% yield. <sup>1</sup>H NMR (400 MHz, CDCl<sub>3</sub>): 7.84-7.82 (m, 2H), 7.54 (t, *J* = 7.4 Hz, 1H), 7.41 (t, *J* = 7.9 Hz, 2H), 7.38 (dd, *J*<sub>d</sub> = 8.2 Hz, *J*<sub>d</sub> = 1.9 Hz, 1H), 7.23 (d, *J* = 1.9 Hz, 1H), 6.78 (d, *J* = 8.3 Hz, 1H), 3.69 (s, 2H), 3.30 (s, 3H), 1.42 (s, 3H); <sup>13</sup>C NMR (100 MHz, CDCl<sub>3</sub>): 195.8, 180.0, 143.0, 136.1, 136.0, 133.4, 130.6, 128.6, 128.0, 125.0, 114.8, 109.6, 46.1, 45.4, 26.5, 24.9. IR (KBr): 3422, 3060, 2968, 2927, 1717, 1689, 1608, 1490, 1449, 1347, 1244, 1216, 1130, 1117, 1048, 878, 809, 738, 690 cm<sup>-1</sup>. HRMS (ESI) for C<sub>18</sub>H<sub>17</sub>BrNO<sub>2</sub> [M+H]<sup>+</sup> calcd 358.0437, found 358.0439.



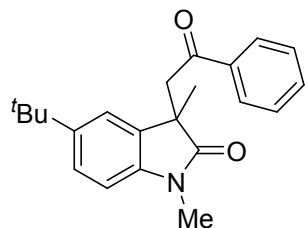

**5-(tert-butyl)-1,3-dimethyl-3-(2-oxo-2-phenylethyl)indolin-2-one (3s)**

Colorless oil; 27.1 mg, 81% yield.  $^1\text{H NMR}$  (400 MHz,  $\text{CDCl}_3$ ): 7.83-7.81 (m, 2H), 7.52-7.48 (m, 1H), 7.38 (t,  $J = 7.4$  Hz, 2H), 7.26 (dd,  $J_d = 8.1$  Hz,  $J_d = 1.9$  Hz, 1H), 7.17 (d,  $J = 1.8$  Hz, 1H), 6.81 (d,  $J = 8.2$  Hz, 1H), 3.69 (d,  $J = 17.5$  Hz, 1H), 3.60 (d,  $J = 17.5$  Hz, 1H), 3.28 (s, 3H), 1.45 (s, 3H), 1.24 (s, 9H);  $^{13}\text{C NMR}$  (100 MHz,  $\text{CDCl}_3$ ): 196.4, 180.6, 145.3, 141.3, 136.6, 133.2, 133.0, 129.0, 128.4, 127.9, 127.6, 124.4, 119.2, 107.4, 45.9, 45.7, 34.4, 31.5, 26.4, 24.8. **IR** (KBr): 3282, 3061, 2961, 2929, 1713, 1692, 1621, 1598, 1500, 1449, 1367, 1351, 1255, 1215, 1119, 871, 814, 747, 691  $\text{cm}^{-1}$ . **HRMS** (ESI) for  $\text{C}_{22}\text{H}_{26}\text{NO}_2$   $[\text{M}+\text{H}]^+$  calcd 336.1958, found 336.1956.

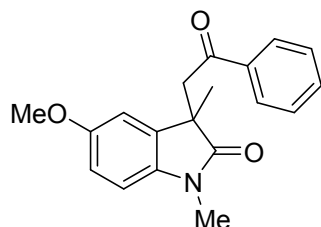

**5-methoxy-1,3-dimethyl-3-(2-oxo-2-phenylethyl)indolin-2-one (3t)**

Colorless oil; 27.9 mg, 90% yield.  $^1\text{H NMR}$  (400 MHz,  $\text{CDCl}_3$ ): 7.85-7.83 (m, 2H), 7.51 (t,  $J = 7.4$  Hz, 1H), 7.39 (t,  $J = 7.8$  Hz, 2H), 6.81-6.76 (m, 3H), 3.73 (s, 3H), 3.69 (d,  $J = 18.4$  Hz, 1H), 3.64 (d,  $J = 18.4$  Hz, 1H), 3.29 (s, 3H), 1.43 (s, 3H);  $^{13}\text{C NMR}$  (100 MHz,  $\text{CDCl}_3$ ): 195.8, 180.1, 142.5, 136.1, 135.6, 133.4, 128.6, 128.0, 127.7, 127.5, 122.3, 109.0, 46.1, 45.4, 26.6, 24.8. **IR** (KBr): 3402, 3060, 2965, 2929, 1708, 1690, 1599, 1500, 1470, 1449, 1353, 1292, 1221, 1127, 1041, 871, 806, 761, 690  $\text{cm}^{-1}$ . **HRMS** (ESI) for  $\text{C}_{19}\text{H}_{20}\text{NO}_3$   $[\text{M}+\text{H}]^+$  calcd 310.1438, found 310.1439.

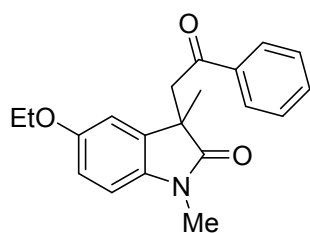

**5-ethoxy-1,3-dimethyl-3-(2-oxo-2-phenylethyl)indolin-2-one (3u)**

Colorless oil; 27.2 mg, 84% yield.  $^1\text{H NMR}$  (400 MHz,  $\text{CDCl}_3$ ): 7.84-7.82 (m, 2H), 7.51 (t,  $J = 7.4$  Hz, 1H), 7.39 (t,  $J = 7.6$  Hz, 2H), 6.80-6.75 (m, 3H), 3.94 (q,  $J = 7.0$  Hz, 2H), 3.68 (d,  $J = 18.0$  Hz, 1H), 3.63 (d,  $J = 18.0$  Hz, 1H), 3.28 (s, 3H), 1.43 (s, 3H), 1.35 (t,  $J = 7.0$  Hz, 3H);  $^{13}\text{C NMR}$  (100 MHz,  $\text{CDCl}_3$ ): 196.0, 180.2, 155.1, 137.4, 136.4, 135.1, 133.1, 128.5, 128.0, 122.1, 110.6, 108.3, 64.0, 46.0, 45.7, 26.5, 24.9, 14.9. **IR** (KBr): 3404, 3061, 2975, 2927, 1709, 1691, 1600, 1501, 1449, 1354, 1294, 1245, 1220, 1114, 1046, 870, 803, 763, 691  $\text{cm}^{-1}$ . **HRMS** (ESI) for  $\text{C}_{20}\text{H}_{22}\text{NO}_3$   $[\text{M}+\text{H}]^+$  calcd 324.1594, found 324.1596.

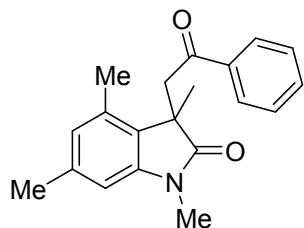

**1,3,4,6-tetramethyl-3-(2-oxo-2-phenylethyl)indolin-2-one (3v)**

Colorless oil; 24.6 mg, 80% yield. <sup>1</sup>H NMR (400 MHz, CDCl<sub>3</sub>): 7.82-7.80 (m, 2H), 7.50 (t, *J* = 7.6 Hz, 1H), 7.38 (t, *J* = 8.0 Hz, 2H), 6.56 (d, *J* = 4.0 Hz, 2H), 3.92 (d, *J* = 17.8 Hz, 1H), 3.67 (d, *J* = 17.8 Hz, 1H), 3.25 (s, 3H), 2.32 (s, 3H), 2.25 (s, 3H), 1.47 (s, 3H); <sup>13</sup>C NMR (100 MHz, CDCl<sub>3</sub>): 196.4, 180.7, 144.2, 137.5, 136.2, 133.0, 132.4, 129.0, 128.4, 127.9, 127.6, 127.4, 125.3, 107.0, 45.8, 45.0, 26.4, 23.0, 21.5, 18.1. IR (KBr): 3408, 3058, 2967, 2927, 1713, 1692, 1621, 1598, 1501, 1467, 1449, 1342, 1240, 1213, 1061, 914, 833, 730, 690 cm<sup>-1</sup>. HRMS (ESI) for C<sub>20</sub>H<sub>22</sub>NO<sub>2</sub> [M+H]<sup>+</sup> calcd 308.1645, found 308.1644.

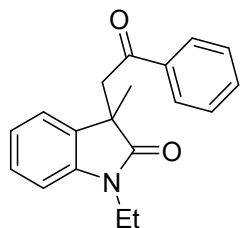

**1-ethyl-3-methyl-3-(2-oxo-2-phenylethyl)indolin-2-one (3w)**

Colorless oil; 27.0 mg, 92% yield. <sup>1</sup>H NMR (400 MHz, CDCl<sub>3</sub>): 7.84-7.82 (m, 2H), 7.50 (tt, *J*<sub>t</sub> = 7.2 Hz, *J*<sub>t</sub> = 1.2 Hz, 1H), 7.40-7.36 (m, 2H), 7.23 (td, *J*<sub>t</sub> = 7.6 Hz, *J*<sub>d</sub> = 1.2 Hz, 1H), 7.13 (dd, *J*<sub>d</sub> = 7.3 Hz, *J*<sub>d</sub> = 0.8 Hz, 1H), 6.96 (td, *J*<sub>t</sub> = 7.5 Hz, *J*<sub>d</sub> = 0.8 Hz, 1H), 6.91 (d, *J* = 7.6 Hz, 1H), 3.93-3.77 (m, 2H), 3.71 (d, *J* = 17.8 Hz, 1H), 3.64 (d, *J* = 17.8 Hz, 1H), 1.43 (s, 3H), 1.34 (t, *J* = 7.2 Hz, 3H); <sup>13</sup>C NMR (100 MHz, CDCl<sub>3</sub>): 196.0, 180.1, 142.9, 136.5, 134.0, 133.1, 128.4, 128.0, 127.7, 121.9, 121.9, 108.3, 45.9, 45.2, 34.7, 25.0, 12.3. IR (KBr): 3402, 3057, 2973, 2930, 1710, 1691, 1613, 1490, 1468, 1449, 1377, 1353, 1217, 1132, 756, 741, 690 cm<sup>-1</sup>. HRMS (ESI) for C<sub>19</sub>H<sub>20</sub>NO<sub>2</sub> [M+H]<sup>+</sup> calcd 294.1489, found 294.1491.

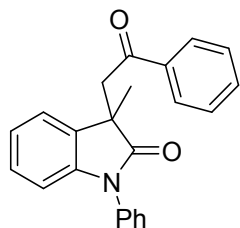

**3-methyl-3-(2-oxo-2-phenylethyl)-1-phenylindolin-2-one (3x)**

Colorless oil; 25.2 mg, 72% yield. <sup>1</sup>H NMR (400 MHz, CDCl<sub>3</sub>): 7.88-7.86 (m, 2H), 7.58-7.50 (m, 5H), 7.42-7.38 (m, 3H), 7.18-7.14 (m, 2H), 7.01-6.97 (m, 1H), 6.85-6.83 (m, 1H), 3.82 (d, *J* = 17.9 Hz, 1H), 3.75 (d, *J* = 17.9 Hz, 1H), 1.56 (s, 3H); <sup>13</sup>C NMR (100 MHz, CDCl<sub>3</sub>): 196.0, 180.1, 144.1, 136.3, 135.1, 133.5, 133.2, 129.5, 128.5, 128.0, 127.9, 127.7, 127.0, 122.5, 121.8, 109.4, 46.7, 45.3, 25.3. IR (KBr): 3356, 3060, 2967, 2925, 1720, 1688, 1612, 1597, 1502, 1466, 1449, 1378, 1216, 1174, 757, 738, 693 cm<sup>-1</sup>. HRMS (ESI) for C<sub>23</sub>H<sub>20</sub>NO<sub>2</sub> [M+H]<sup>+</sup> calcd 342.1489, found 342.1488.

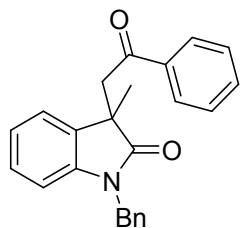

**1-benzyl-3-methyl-3-(2-oxo-2-phenylethyl)indolin-2-one (3y)**

Colorless oil; 33.5 mg, 94% yield. <sup>1</sup>H NMR (400 MHz, CDCl<sub>3</sub>): 7.89-7.87 (m, 2H), 7.53 (t, *J* = 7.3 Hz, 1H), 7.43-7.40 (m, 4H), 7.34 (t, *J* = 7.2 Hz, 2H), 7.27 (t, *J* = 6.9 Hz, 1H), 7.15-7.10 (m, 2H), 6.94 (t, *J* = 7.6 Hz, 1H), 6.73 (d, *J* = 7.8 Hz, 1H), 5.09 (d, *J* = 15.8 Hz, 1H), 4.96 (d, *J* = 15.8 Hz, 1H), 3.78 (d, *J* = 17.8 Hz, 1H), 3.72 (d, *J* = 17.8 Hz, 1H), 1.50 (s, 3H); <sup>13</sup>C NMR (100 MHz, CDCl<sub>3</sub>): 195.9, 180.6, 142.9, 136.4, 136.3, 133.8, 133.2, 128.7, 128.5, 128.0, 127.7, 127.4, 127.2, 122.2, 121.7, 109.3, 45.8, 45.4, 44.0, 25.5. IR (KBr): 3338, 3059, 2967, 2925, 1711, 1690, 1612, 1599, 1489, 1467, 1450, 1354, 1216, 1179, 753, 739, 692 cm<sup>-1</sup>. HRMS (ESI) for C<sub>24</sub>H<sub>22</sub>NO<sub>2</sub> [M+H]<sup>+</sup> calcd 356.1645, found 356.1644.

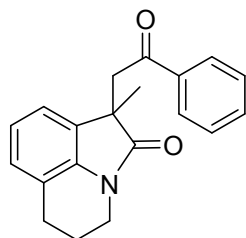

**1-methyl-1-(2-oxo-2-phenylethyl)-5,6-dihydro-4H-pyrrolo[3,2,1-ij]quinolin-2(1H)-one (3ab)**

Colorless oil; 29.2 mg, 96% yield. <sup>1</sup>H NMR (400 MHz, CDCl<sub>3</sub>): 7.84-7.82 (m, 2H), 7.51 (t, *J* = 7.4 Hz, 1H), 7.39 (t, *J* = 7.5 Hz, 2H), 7.00 (d, *J* = 7.5 Hz, 2H), 6.86 (t, *J* = 7.5 Hz, 1H), 3.81-3.77 (m, 2H), 3.68 (d, *J* = 17.8 Hz, 1H), 3.60 (d, *J* = 17.8 Hz, 1H), 2.88-2.75 (m, 2H), 2.14-2.00 (m, 2H), 1.46 (s, 3H); <sup>13</sup>C NMR (100 MHz, CDCl<sub>3</sub>): 196.3, 179.4, 139.6, 136.5, 133.0, 132.2, 128.4, 127.9, 126.7, 121.6, 120.1, 119.9, 46.6, 45.9, 38.9, 24.7, 24.5, 21.2. IR (KBr): 3403, 3055, 2964, 2926, 1707, 1690, 1627, 1601, 1483, 1448, 1354, 1217, 1167, 774, 750, 734, 691 cm<sup>-1</sup>. HRMS (ESI) for C<sub>20</sub>H<sub>20</sub>NO<sub>2</sub> [M+H]<sup>+</sup> calcd 306.1489, found 306.1488.

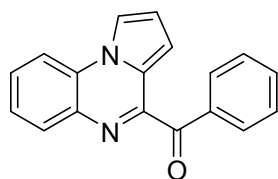

**phenyl(pyrrolo[1,2-a]quinoxalin-4-yl)methanone (6a)**

Yellowish oil; 20.9 mg, 77% yield. <sup>1</sup>H NMR (400 MHz, CDCl<sub>3</sub>): 8.18-8.16 (m, 2H), 8.02-8.00 (m, 2H), 7.89 (d, *J* = 8.2 Hz, 1H), 7.64-7.57 (m, 2H), 7.51-7.46 (m, 3H), 7.21 (dd, *J*<sub>d</sub> = 4.0 Hz, *J*<sub>d</sub> = 1.0 Hz, 1H), 6.94 (dd, *J*<sub>d</sub> = 4.0 Hz, *J*<sub>d</sub> = 2.8 Hz, 1H); <sup>13</sup>C NMR (100 MHz, CDCl<sub>3</sub>): 192.3, 149.9, 135.8, 134.7, 133.5, 131.1, 131.0, 130.3, 129.4, 128.3, 127.9, 125.4, 124.3, 114.9, 114.7, 113.8, 108.9. IR (KBr): 3163, 1666, 1460, 1426, 1374, 1308, 1254, 1202, 1037, 1448, 977, 873, 758, 730, 682 cm<sup>-1</sup>. HRMS (ESI) for C<sub>18</sub>H<sub>13</sub>N<sub>2</sub>O [M+H]<sup>+</sup> calcd 273.1022, found 273.1021.

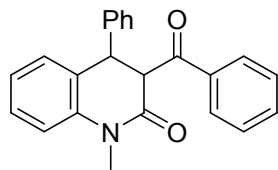

**3-benzoyl-1-methyl-4-phenyl-3,4-dihydroquinolin-2(1H)-one (6b)**

Colorless oil; 12.7 mg, 37% yield.  $^1\text{H NMR}$  (400 MHz,  $\text{CDCl}_3$ ): 7.91-7.89 (m, 2H), 7.54 (tt,  $J_t = 7.4$  Hz,  $J_t = 1.2$  Hz, 1H), 7.43 (t,  $J = 7.9$  Hz, 2H), 7.34-7.27 (m, 3H), 7.24-7.17 (m, 3H), 7.10 (d,  $J = 7.6$  Hz, 1H), 7.00 (td,  $J_t = 7.5$  Hz,  $J_d = 1.0$  Hz, 1H), 6.87 (d,  $J = 7.5$  Hz, 1H), 4.93 (d,  $J = 7.8$  Hz, 1H), 4.71 (d,  $J = 7.8$  Hz, 1H), 3.45 (s, 3H);  $^{13}\text{C NMR}$  (100 MHz,  $\text{CDCl}_3$ ): 195.6, 166.7, 140.0, 139.5, 136.7, 133.3, 129.0, 128.7, 128.6, 128.0, 127.4, 127.3, 123.5, 114.9, 55.9, 44.9, 29.9. **IR** (KBr): 3445, 3062, 3029, 2929, 1690, 1661, 1596, 1495, 1449, 1366, 1289, 1217, 1125, 757, 732, 698  $\text{cm}^{-1}$ . **HRMS** (ESI) for  $\text{C}_{23}\text{H}_{20}\text{NO}_2$   $[\text{M}+\text{H}]^+$  calcd 342.1489, found 342.1487.

## 8. NMR Spectra

### 1,3-dimethyl-3-(2-oxo-2-phenylethyl)indolin-2-one (3a)

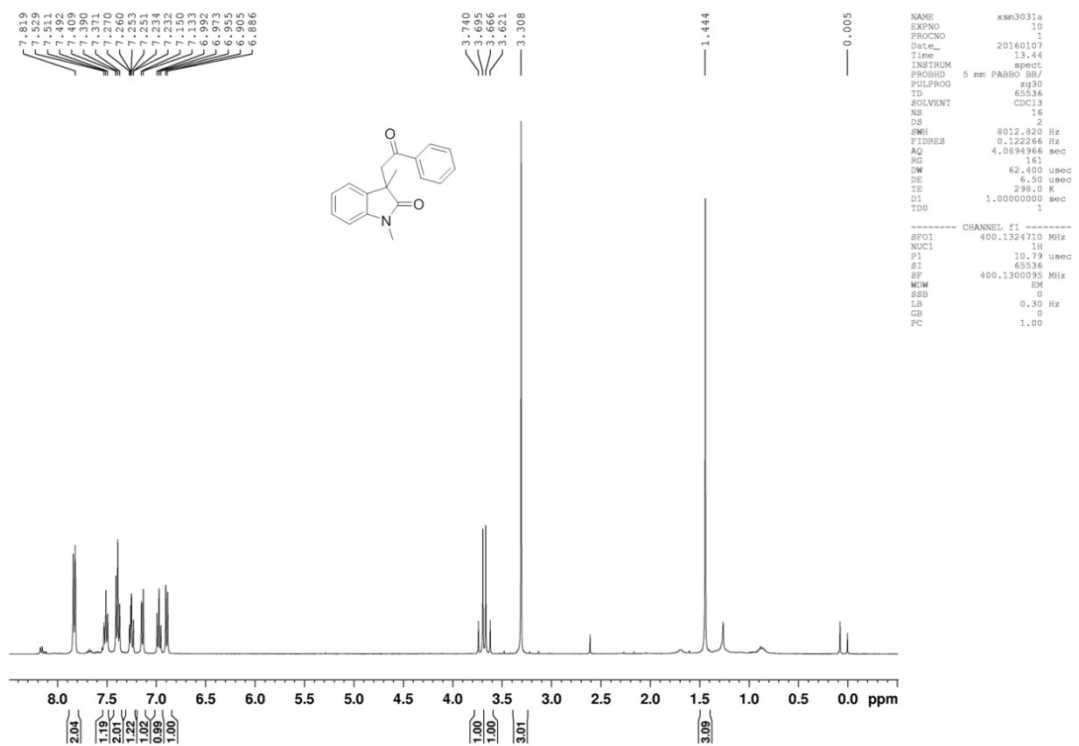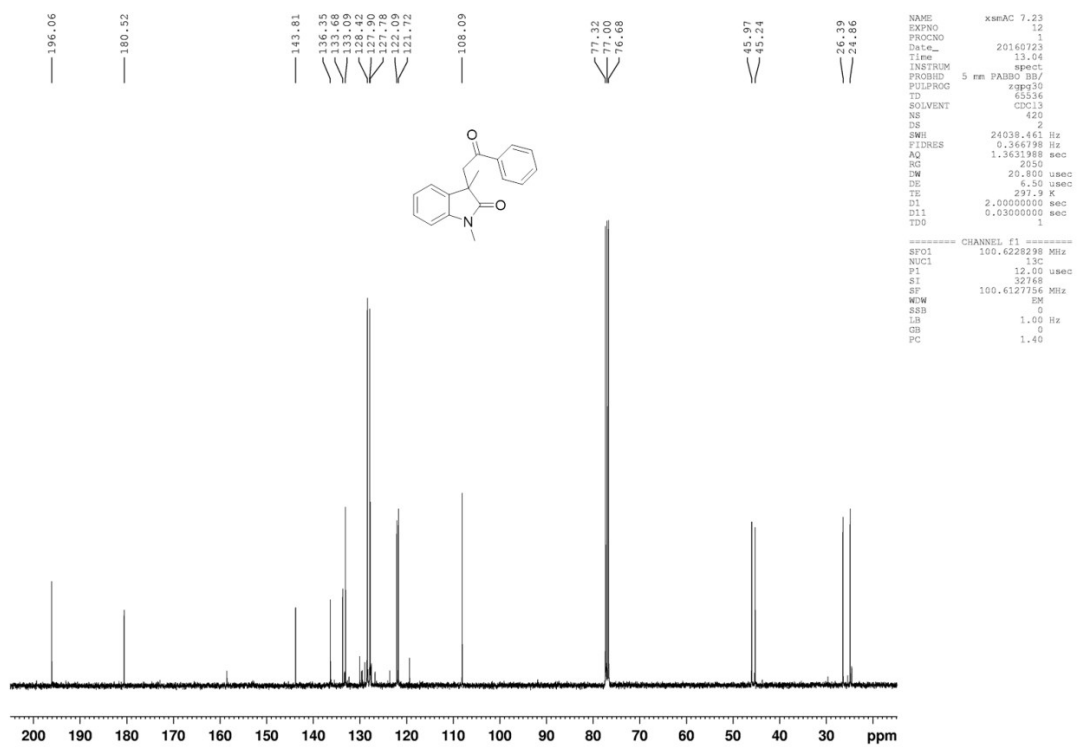



### 3-(2-(2-chlorophenyl)-2-oxoethyl)-1,3-dimethylindolin-2-one (3c)

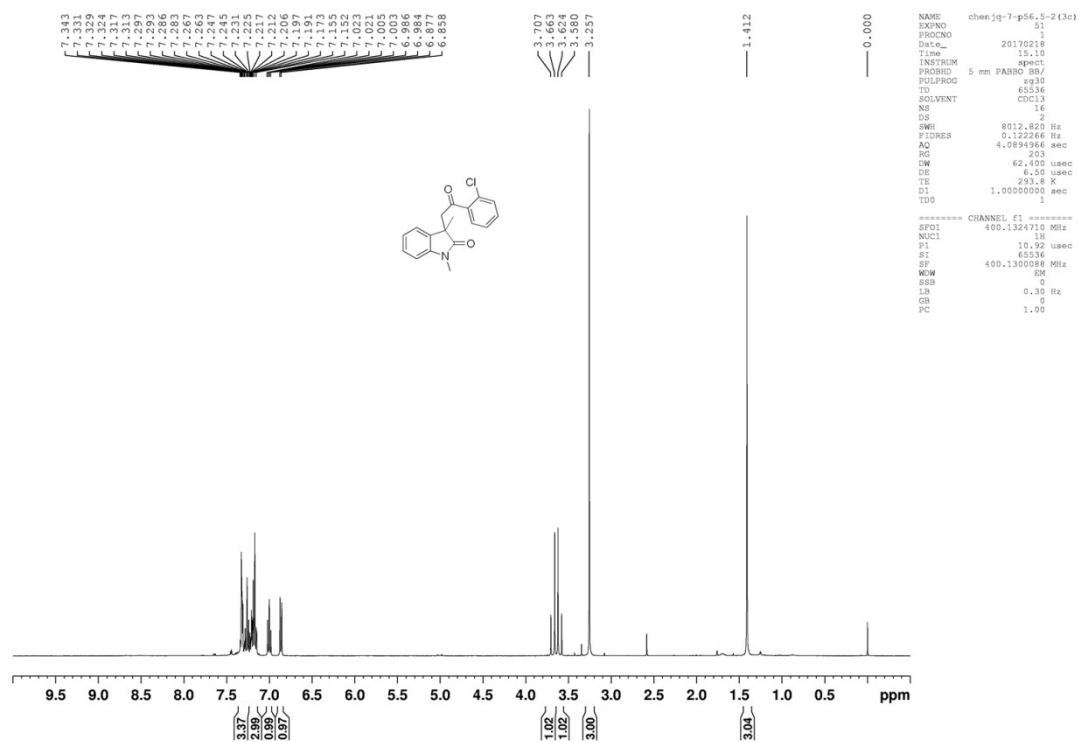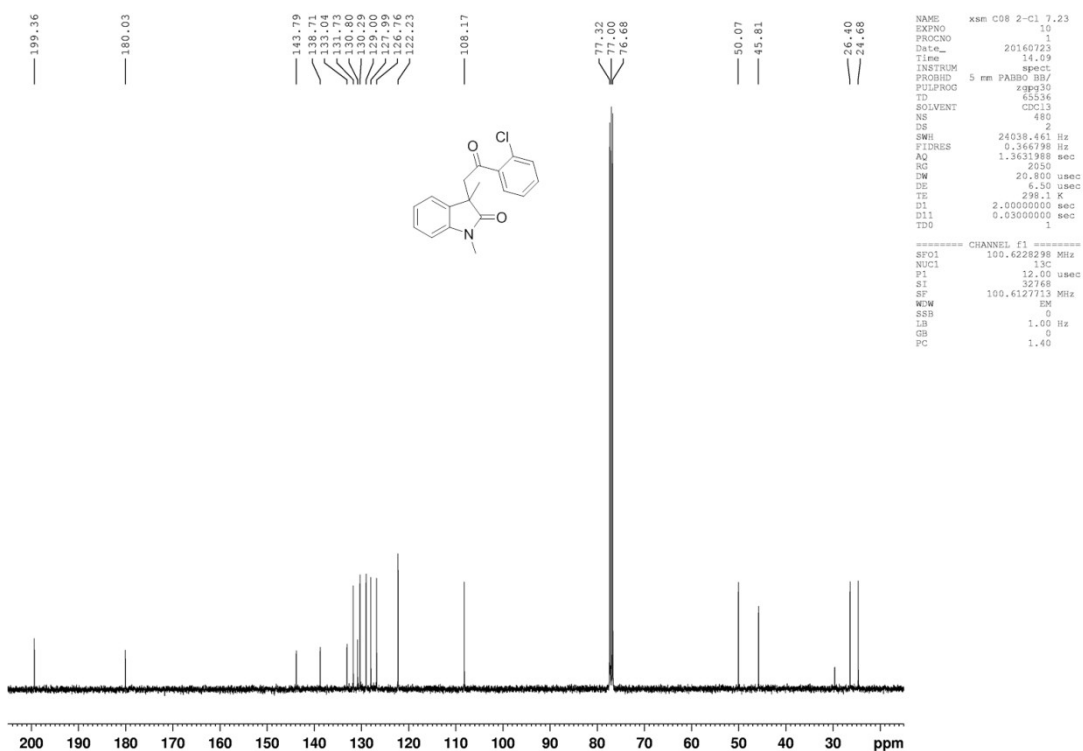









### 3-(2-(4-chlorophenyl)-2-oxoethyl)-1,3-dimethylindolin-2-one (3g)

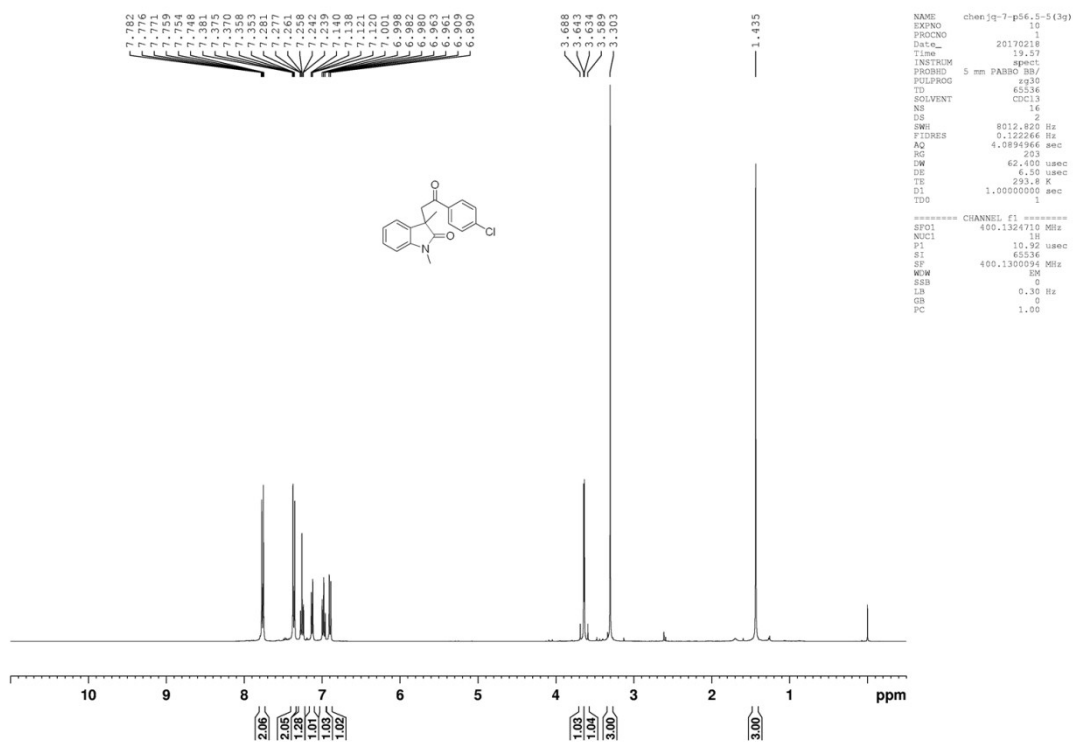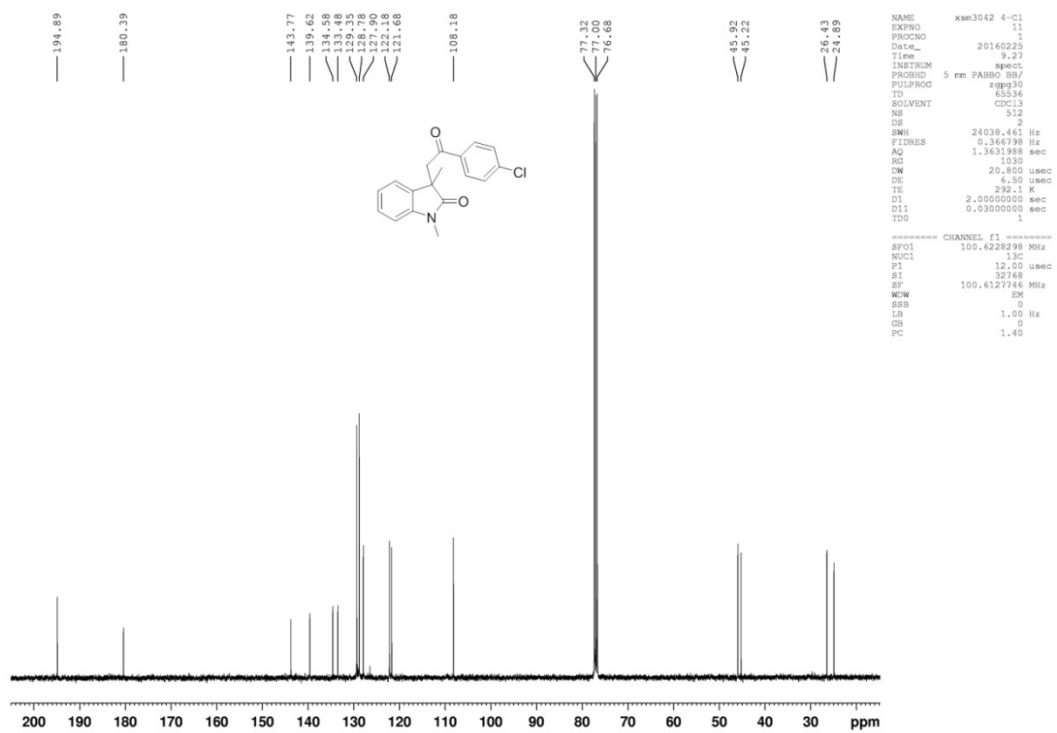

### 3-(2-(4-fluorophenyl)-2-oxoethyl)-1,3-dimethylindolin-2-one (3h)

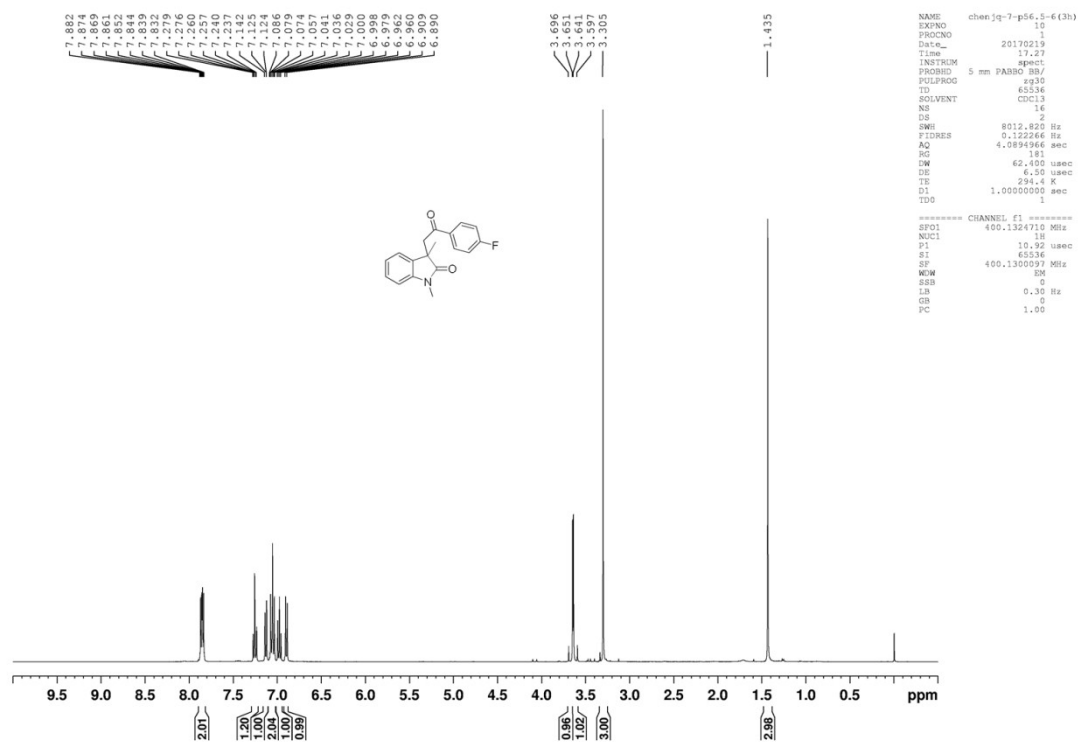



### 3-(2-(4-methoxyphenyl)-2-oxoethyl)-1,3-dimethylindolin-2-one (3j)

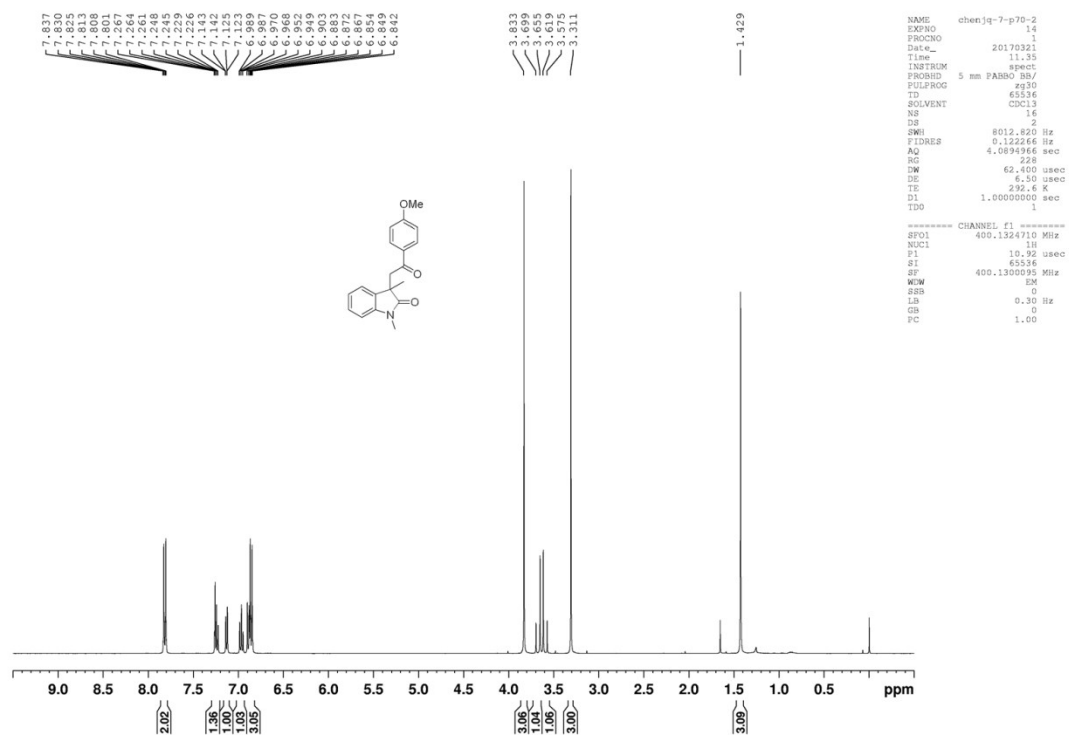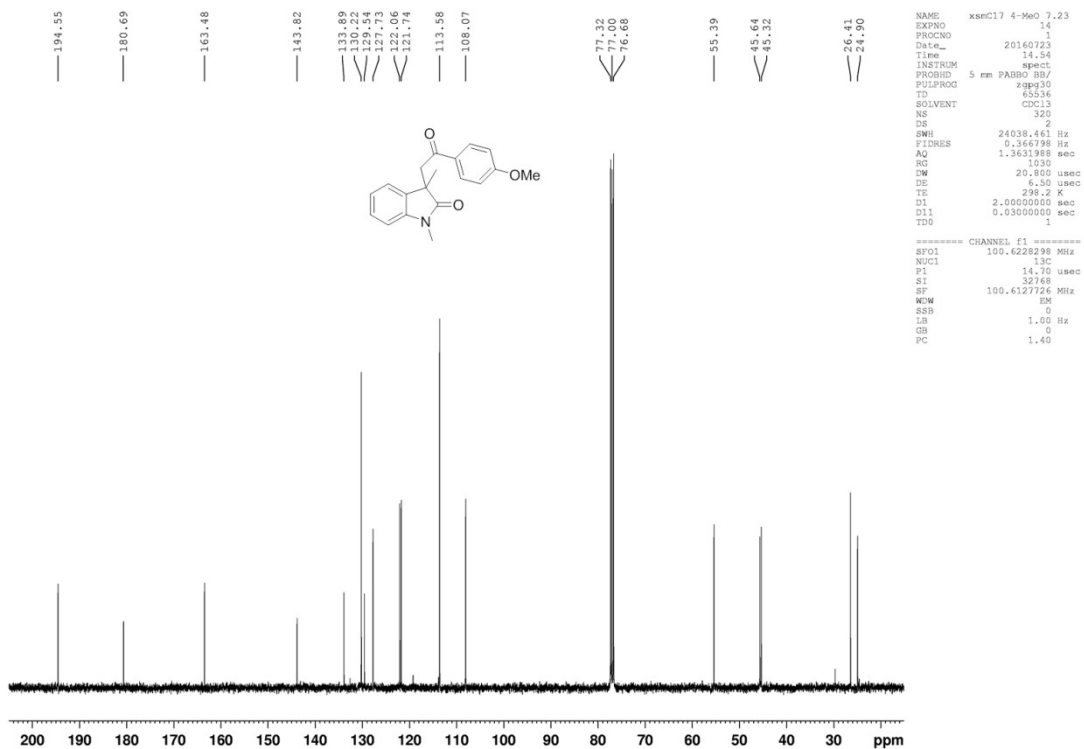



### 3-(2-(3,5-dimethylphenyl)-2-oxoethyl)-1,3-dimethylindolin-2-one (31)

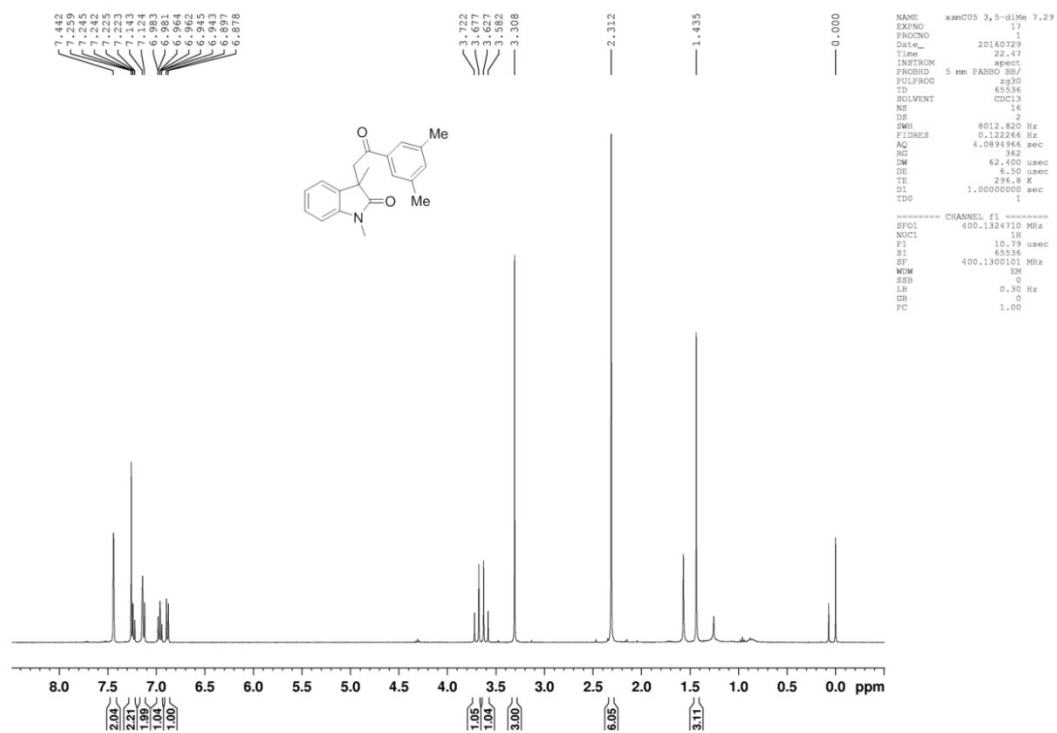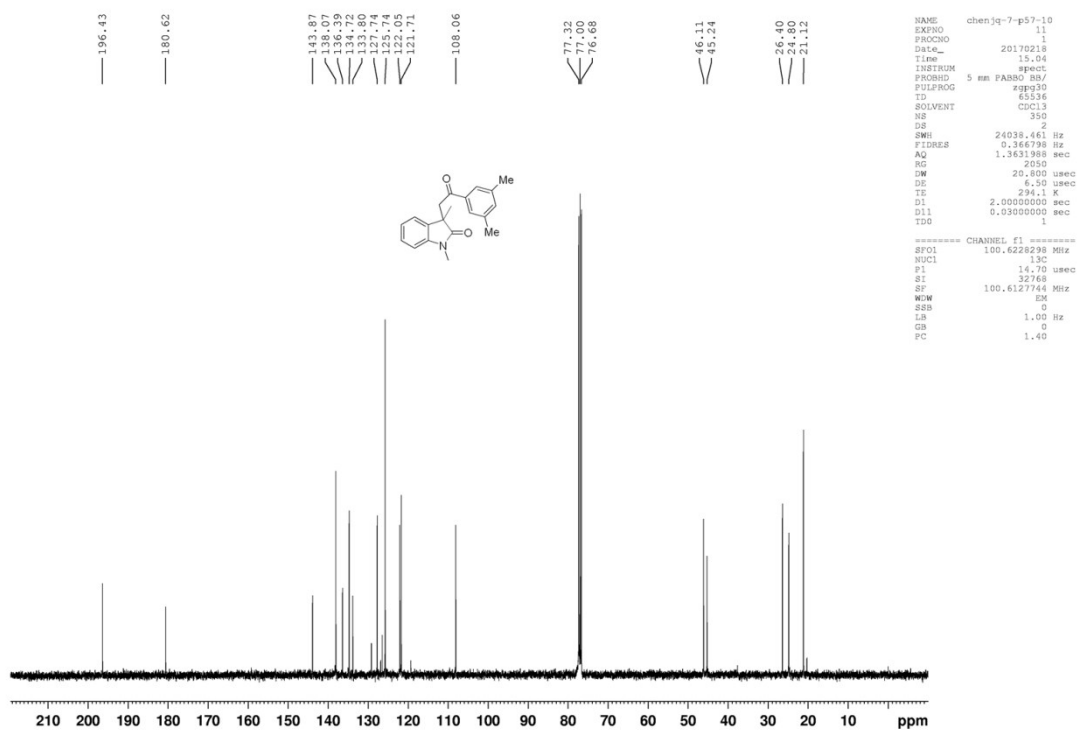



# 1,3,7-trimethyl-3-(2-oxo-2-phenylethyl)indolin-2-one (3m)

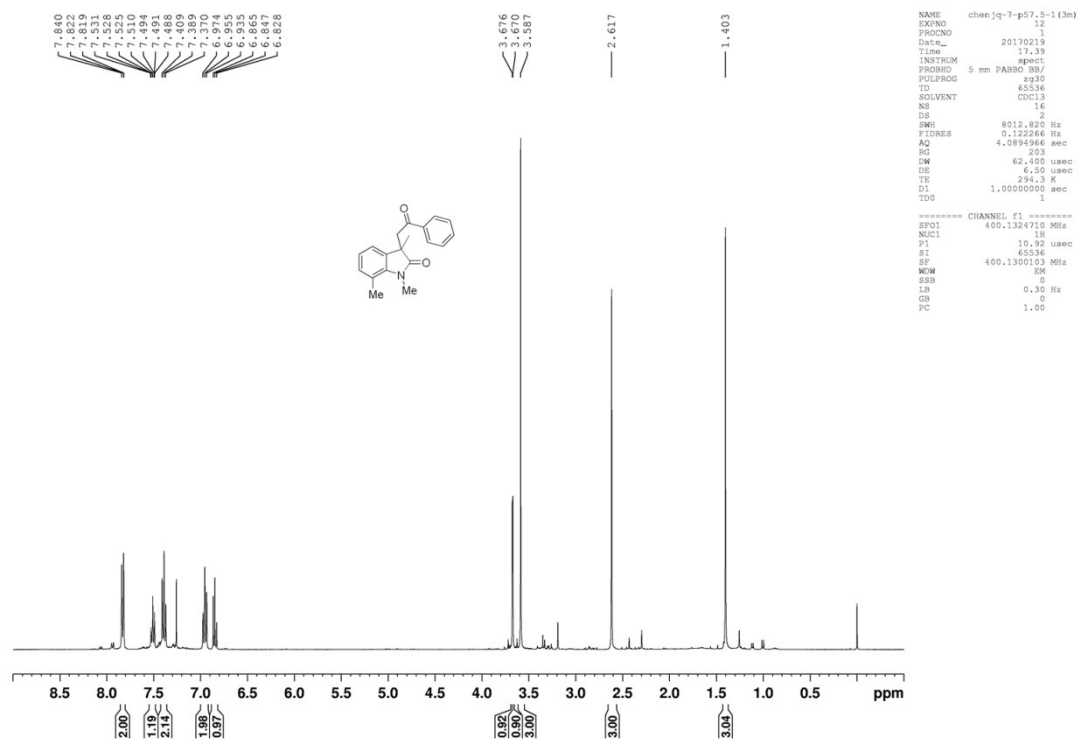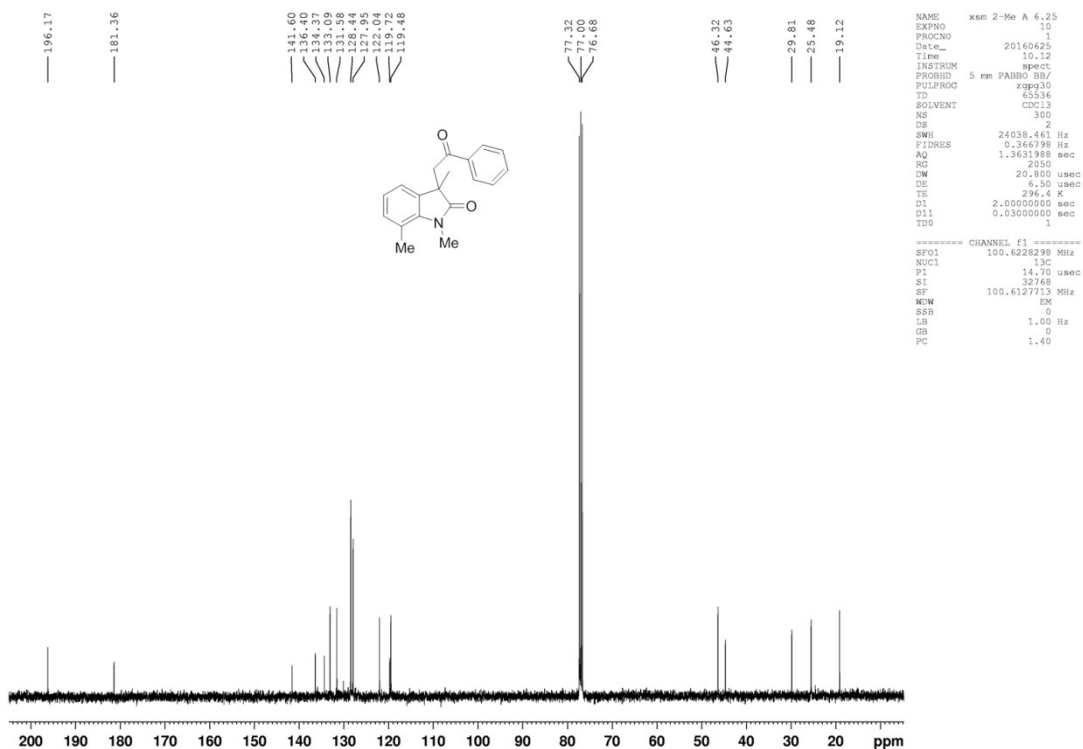

# 7-chloro-1,3-dimethyl-3-(2-oxo-2-phenylethyl)indolin-2-one (3n)

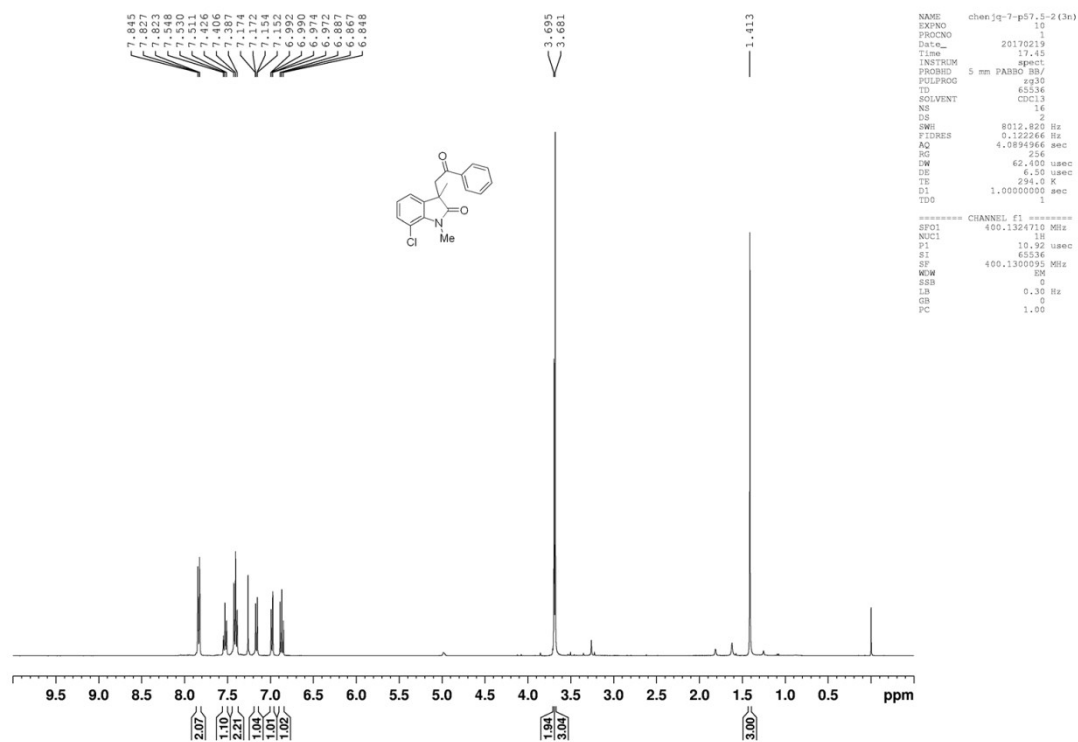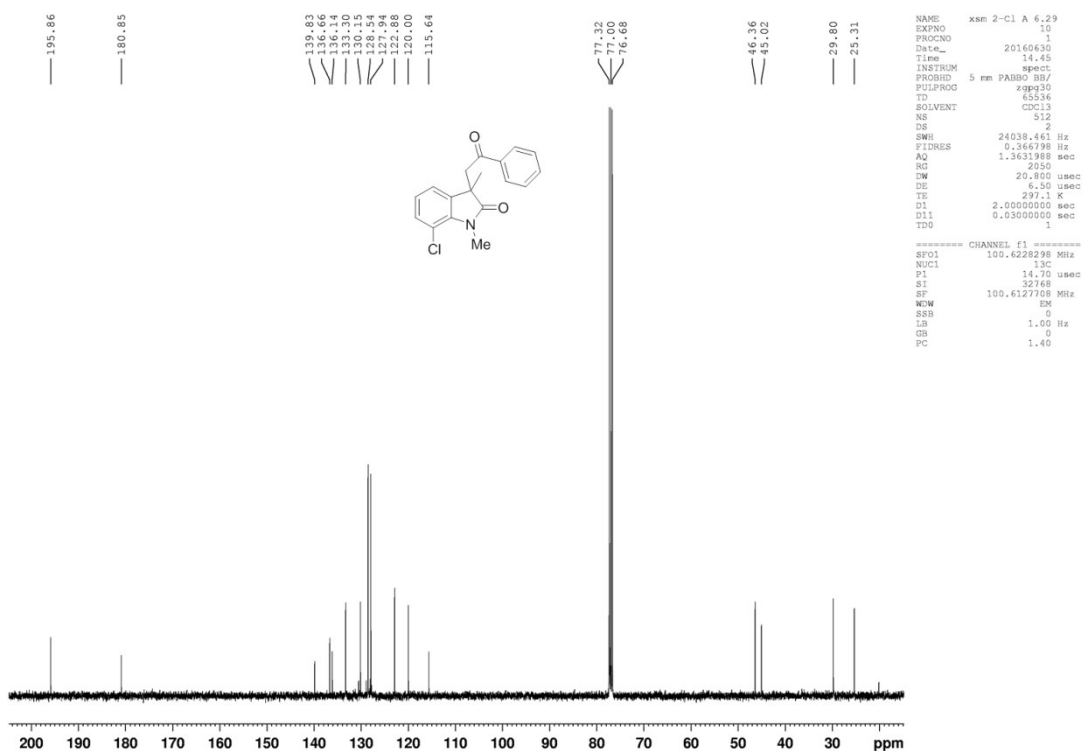

# 1,3,5-trimethyl-3-(2-oxo-2-phenylethyl)indolin-2-one (3o)

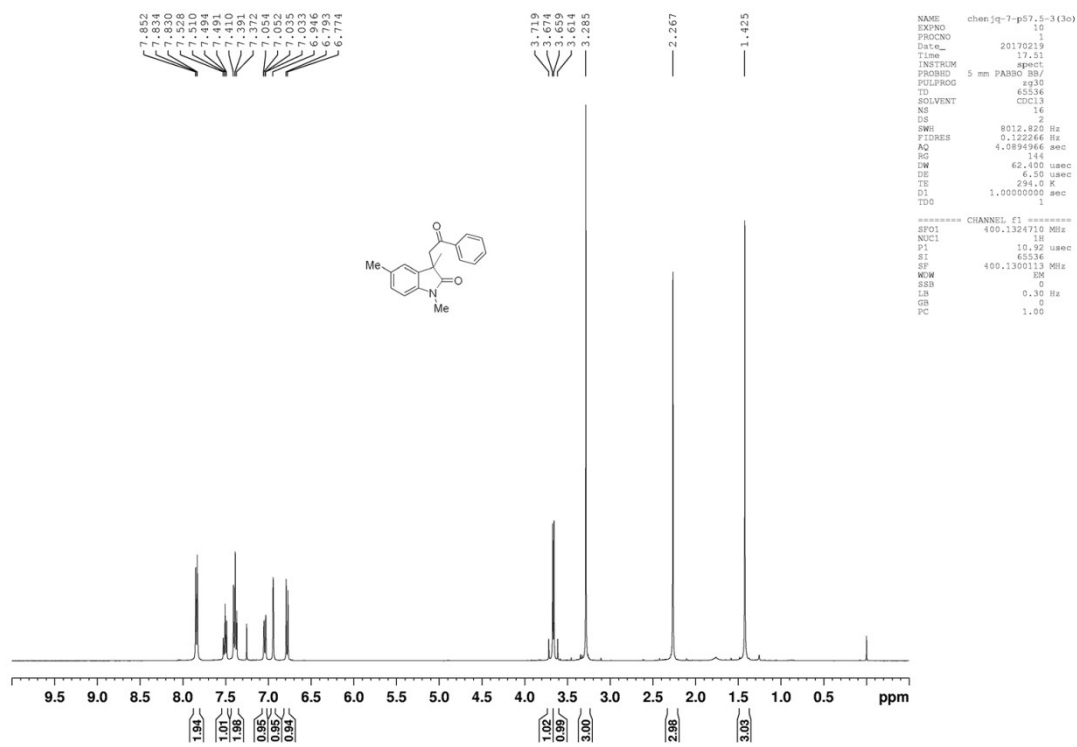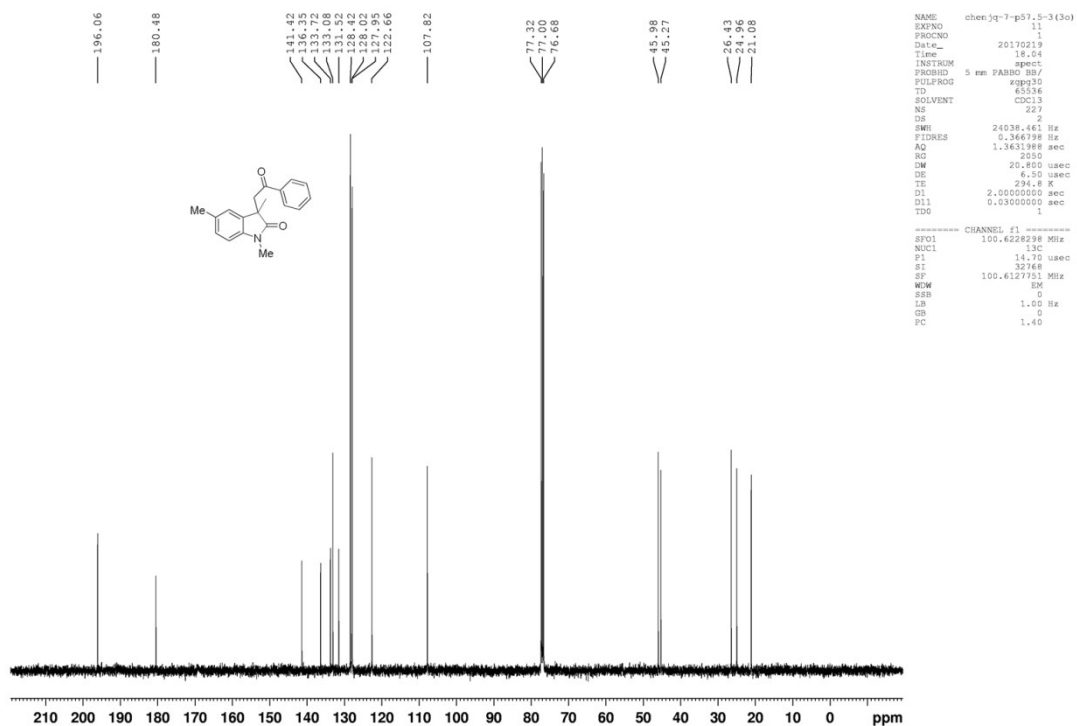

# 5-chloro-1,3-dimethyl-3-(2-oxo-2-phenylethyl)indolin-2-one (3p)

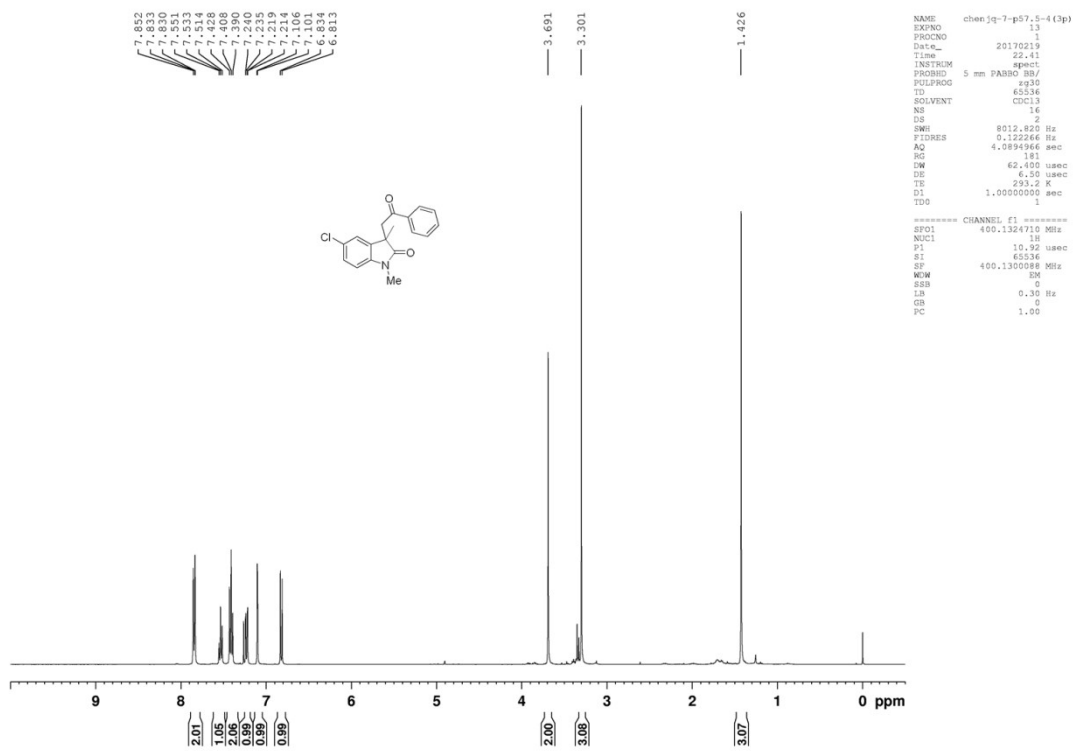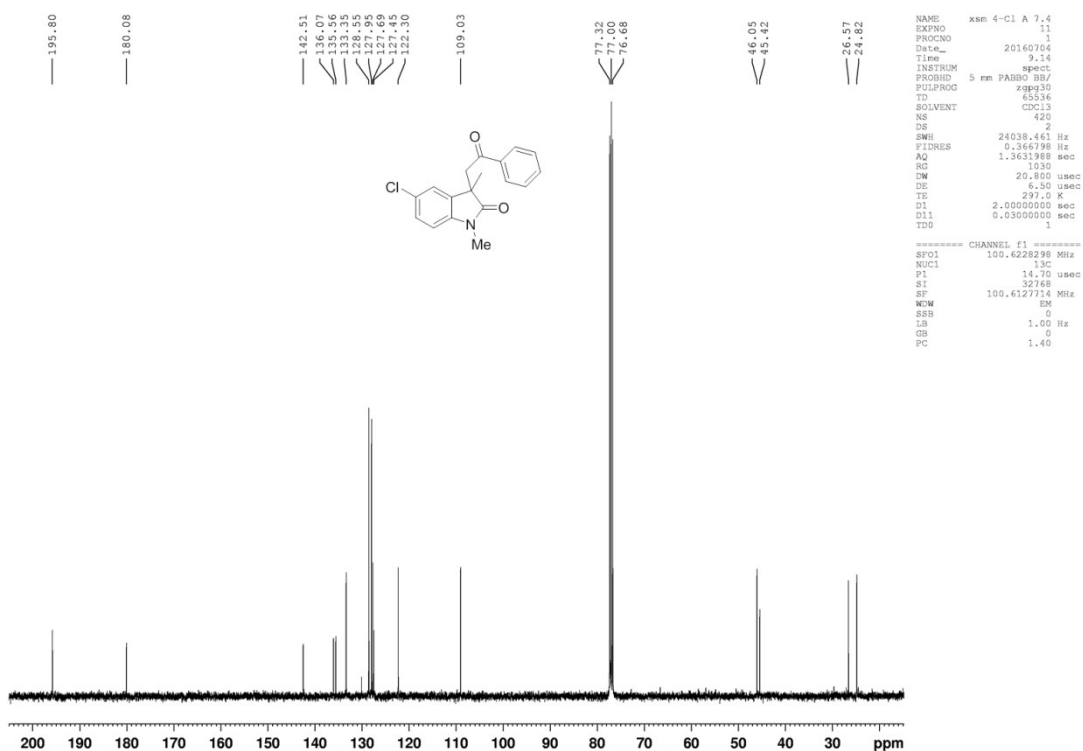

# 5-fluoro-1,3-dimethyl-3-(2-oxo-2-phenylethyl)indolin-2-one (3q)

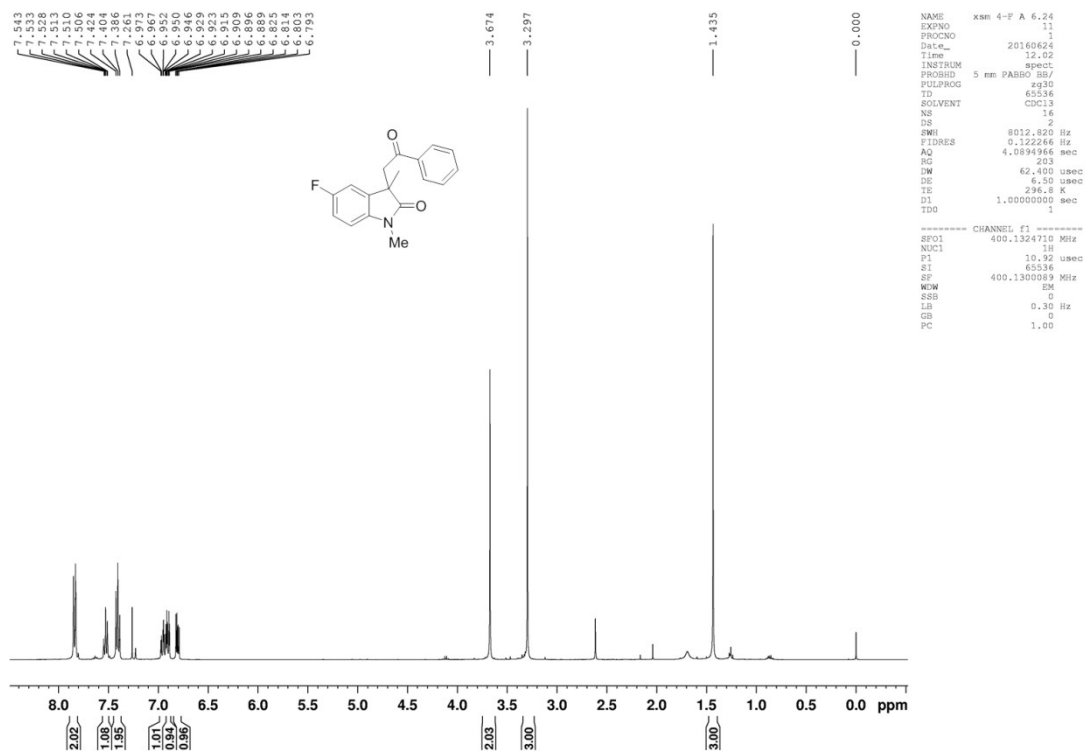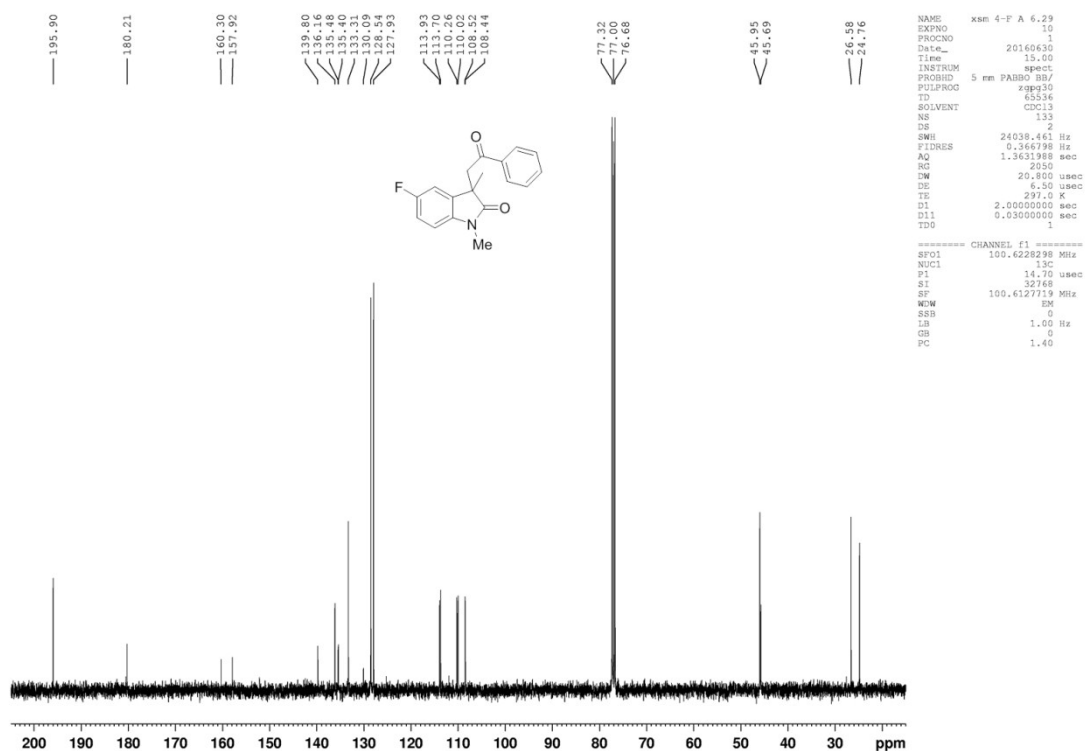

# 5-bromo-1,3-dimethyl-3-(2-oxo-2-phenylethyl)indolin-2-one (3r)

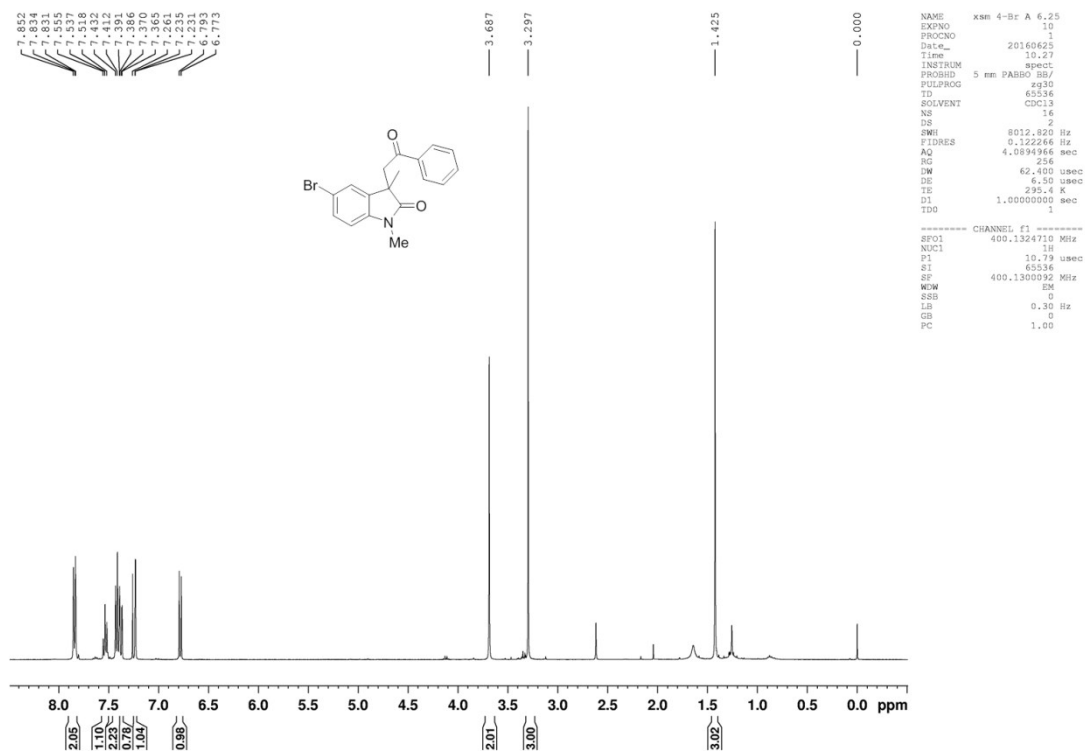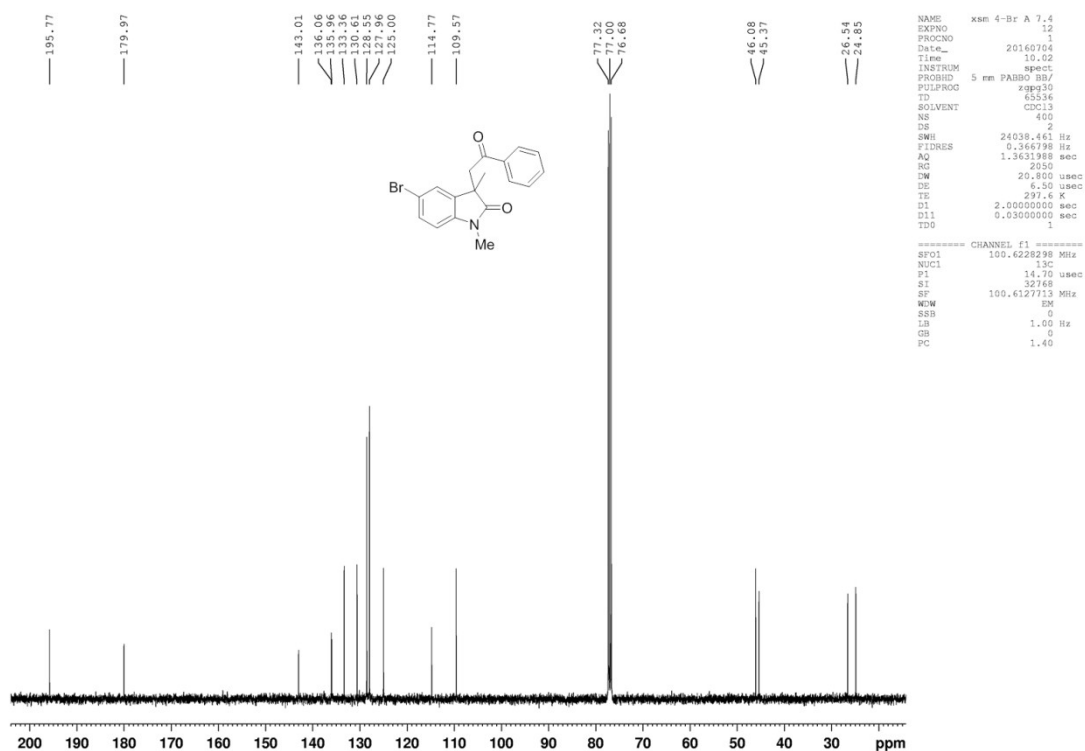

# 5-(tert-butyl)-1,3-dimethyl-3-(2-oxo-2-phenylethyl)indolin-2-one (3s)

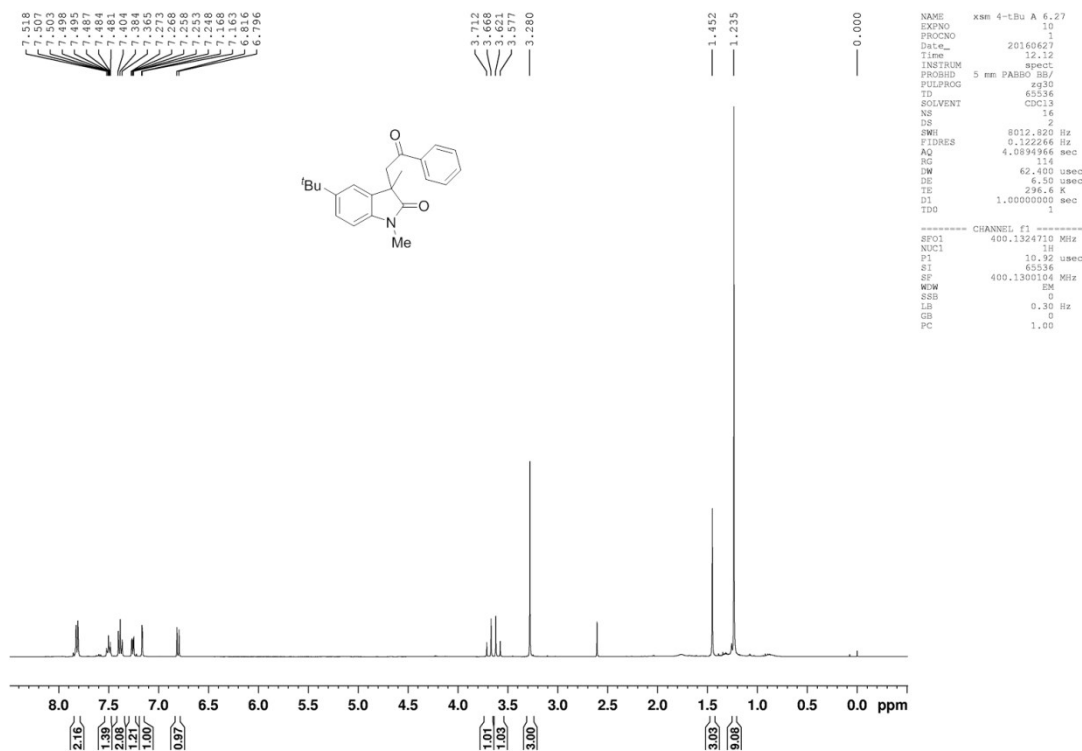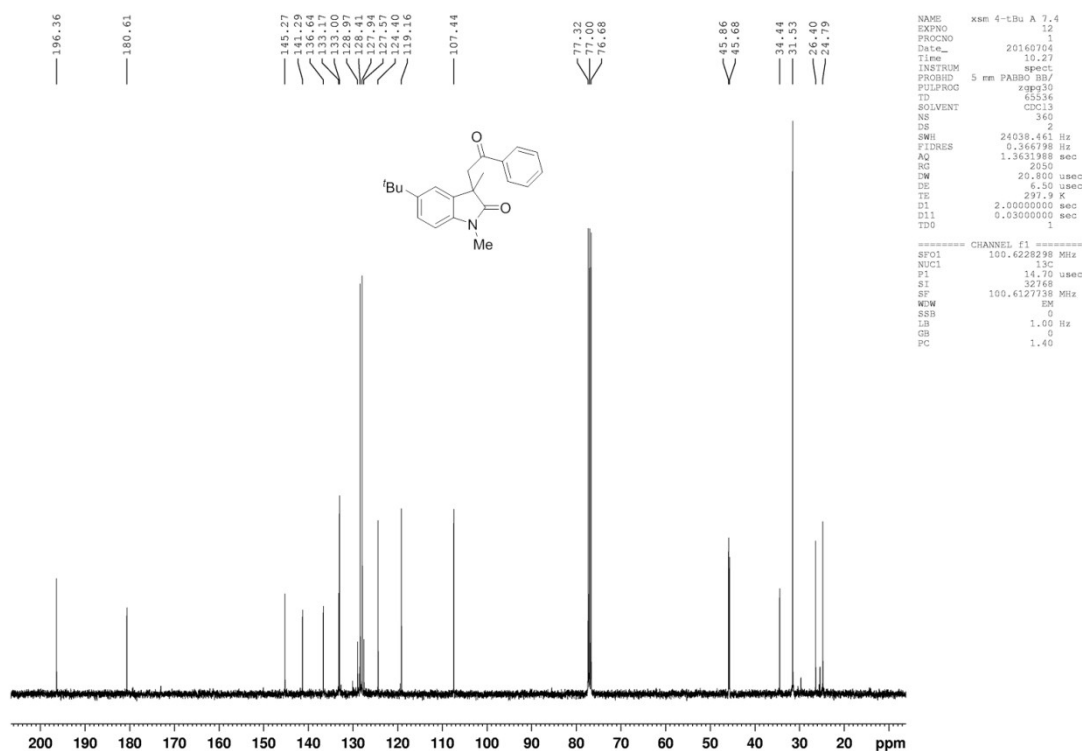

# 5-methoxy-1,3-dimethyl-3-(2-oxo-2-phenylethyl)indolin-2-one (3t)

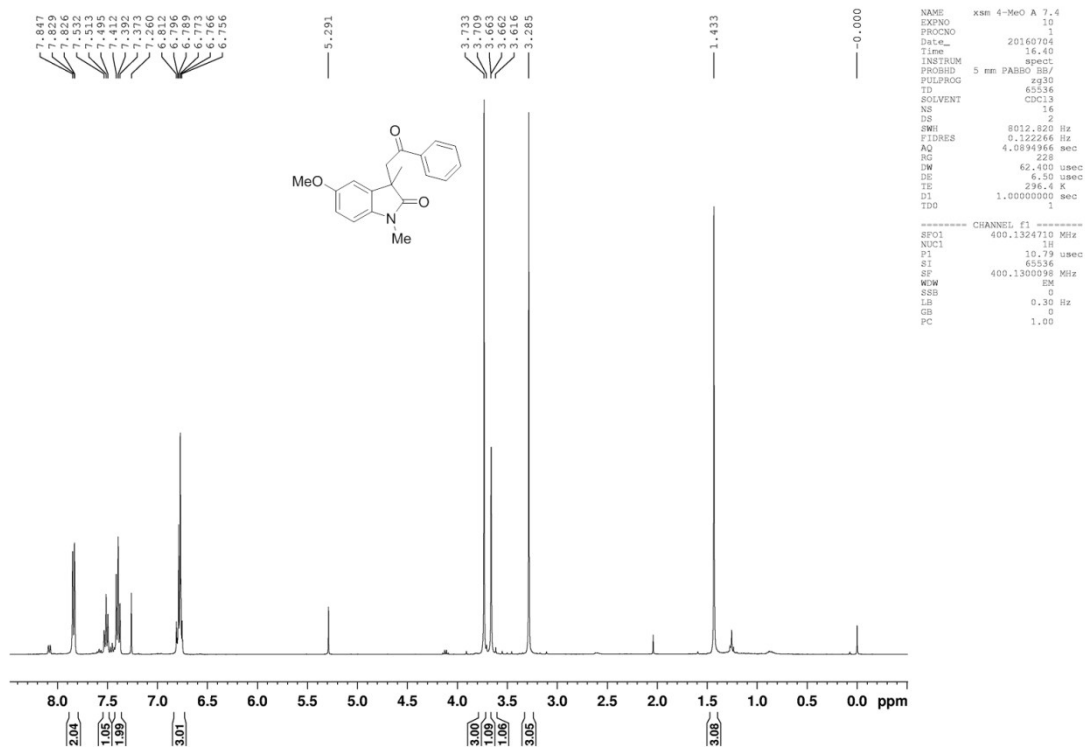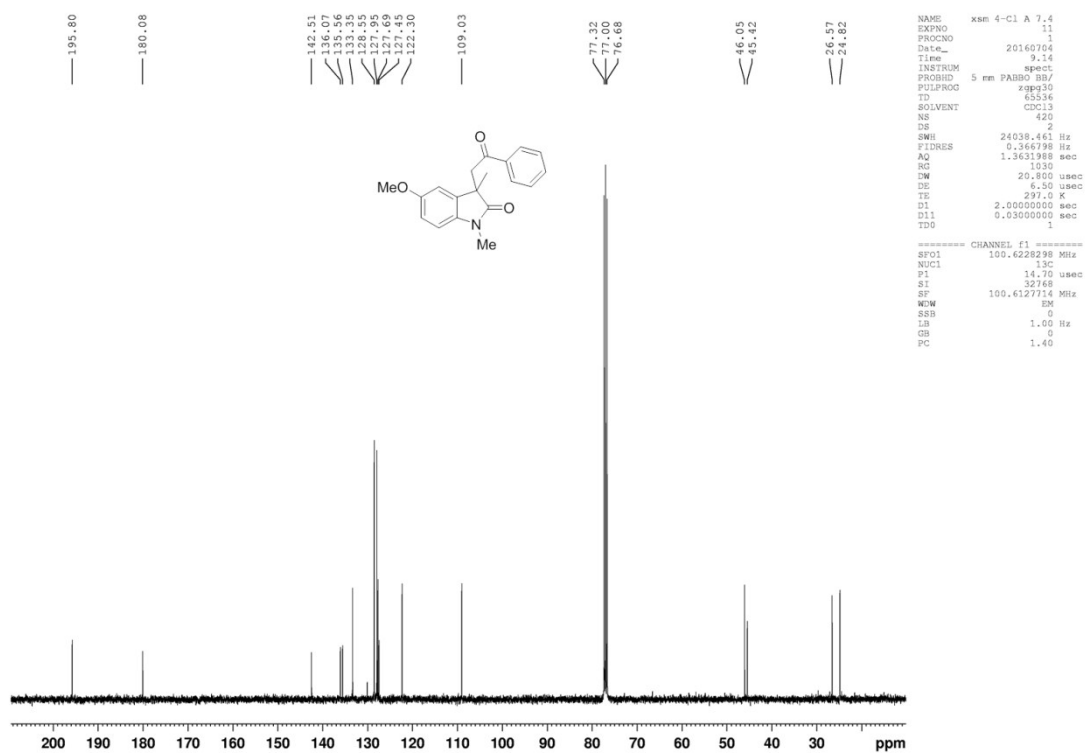



# 5-ethoxy-1,3-dimethyl-3-(2-oxo-2-phenylethyl)indolin-2-one (3u)

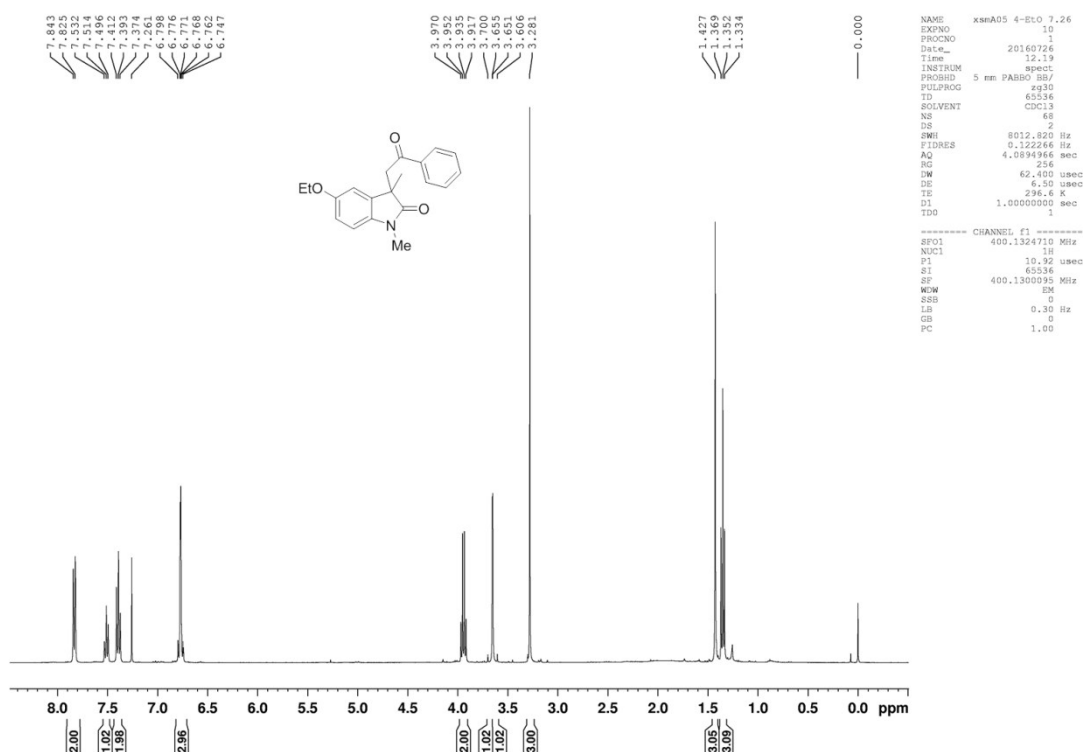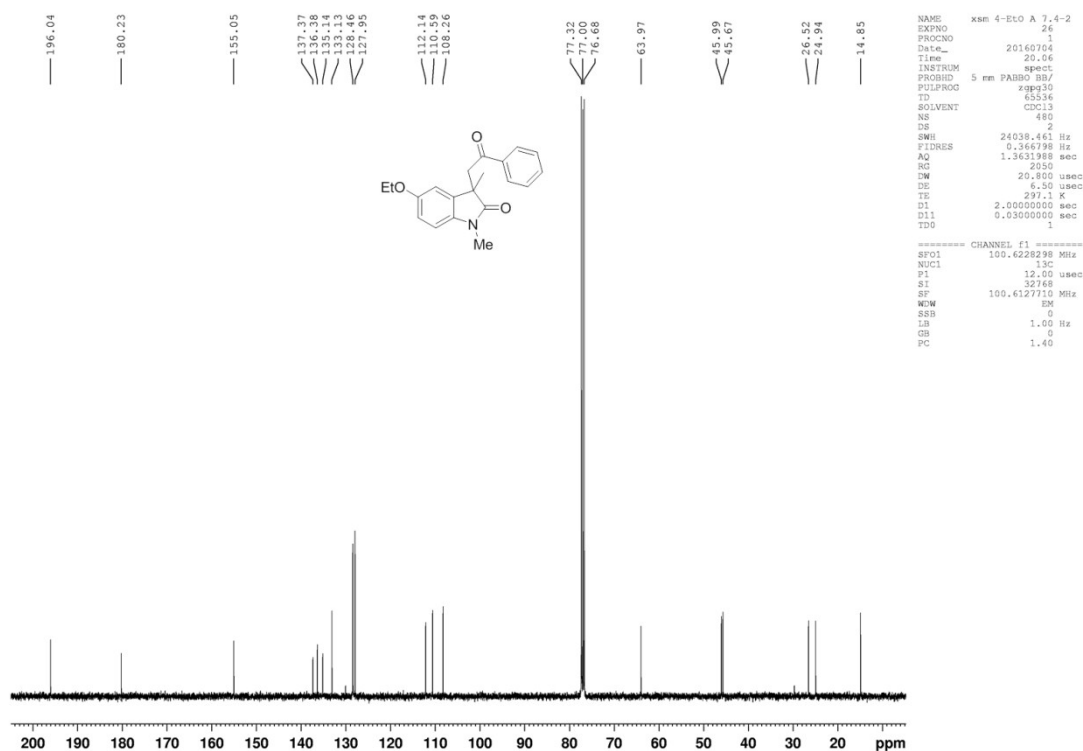

# 1,3,4,6-tetramethyl-3-(2-oxo-2-phenylethyl)indolin-2-one (3v)

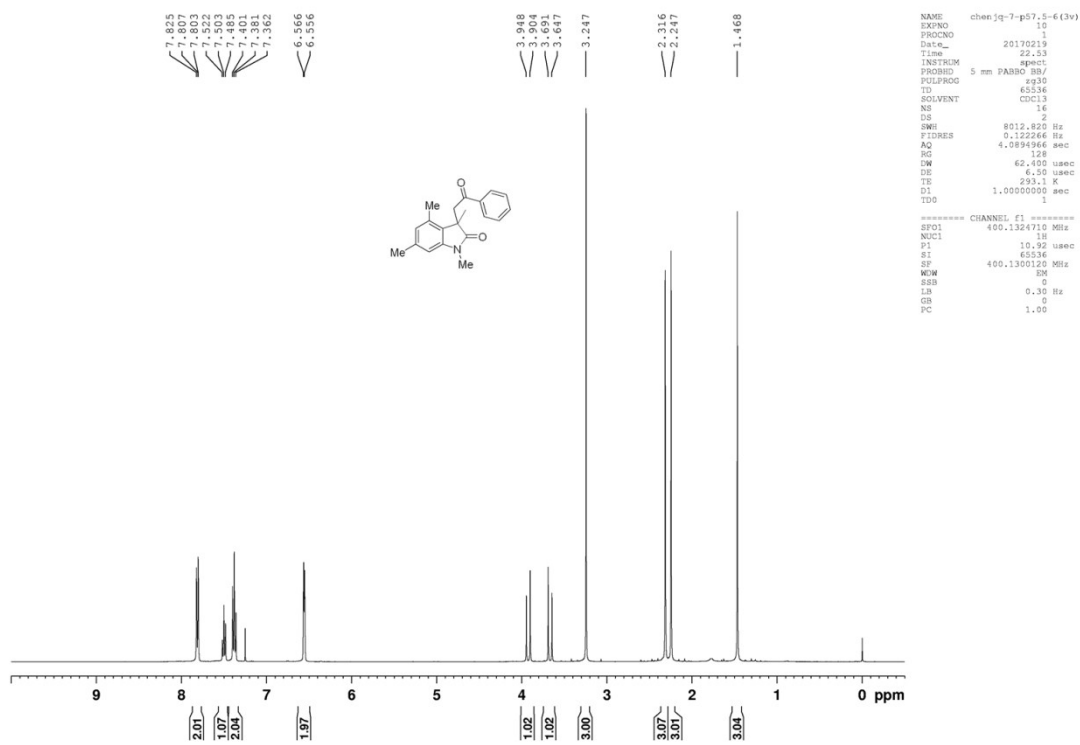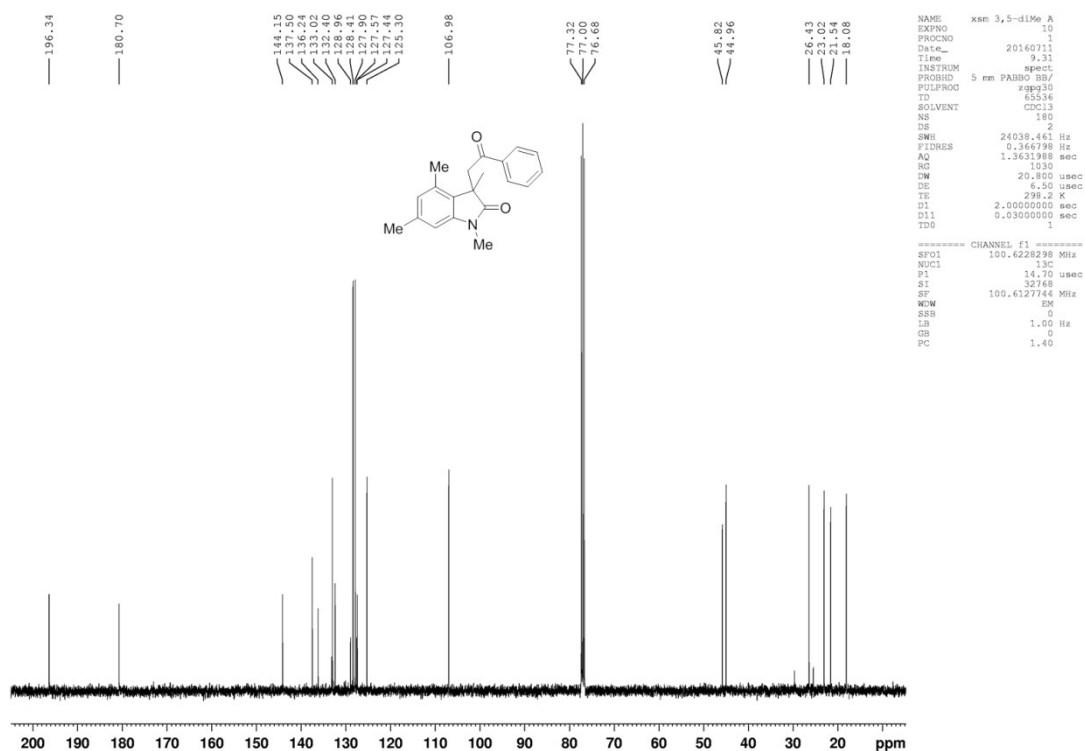





# 1-benzyl-3-methyl-3-(2-oxo-2-phenylethyl)indolin-2-one (3y)

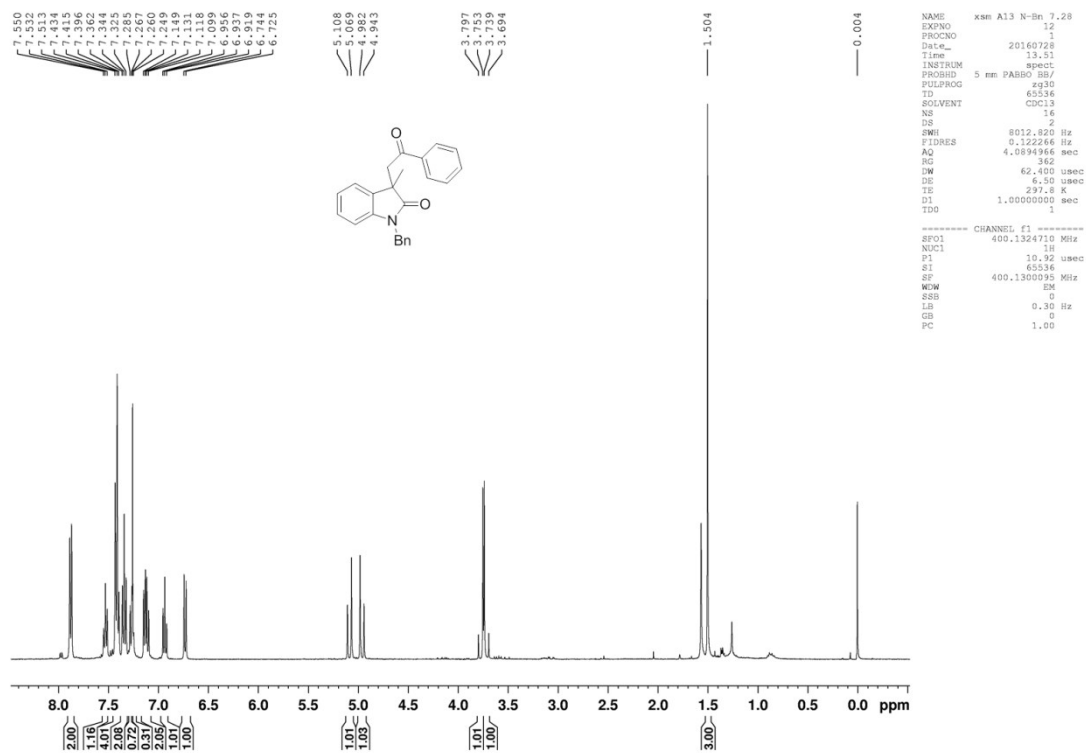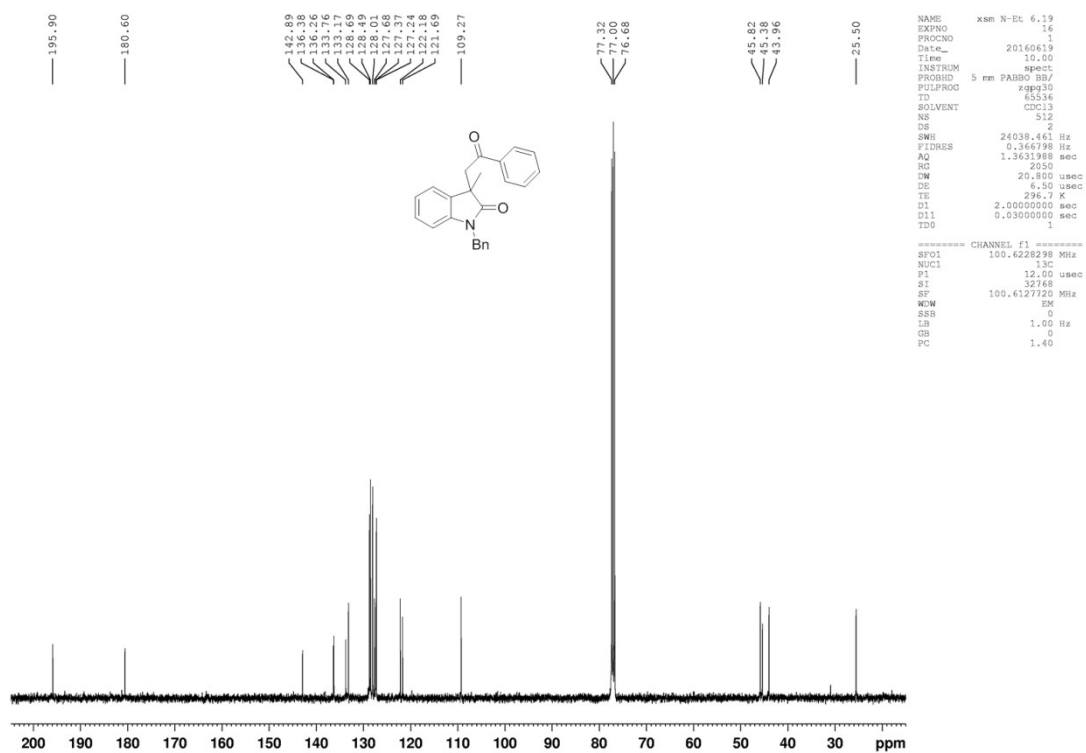

# 1-methyl-1-(2-oxo-2-phenylethyl)-5,6-dihydro-4H-pyrrolo[3,2,1-ij]quinolin-2(1H)-one (3ab)

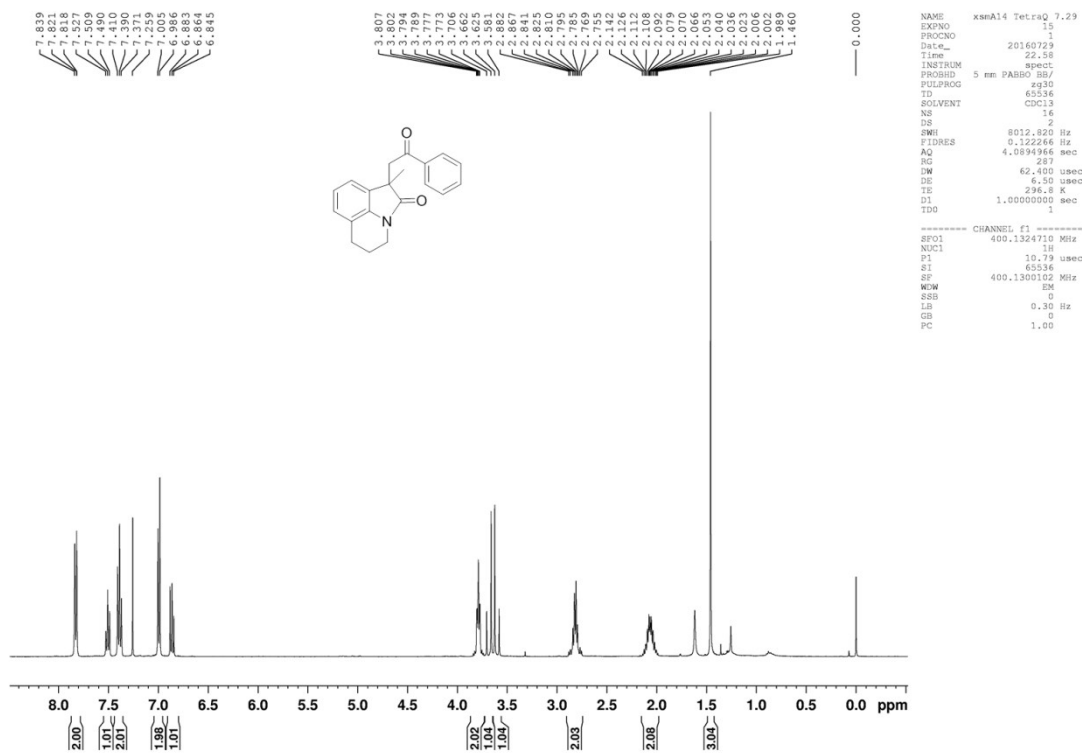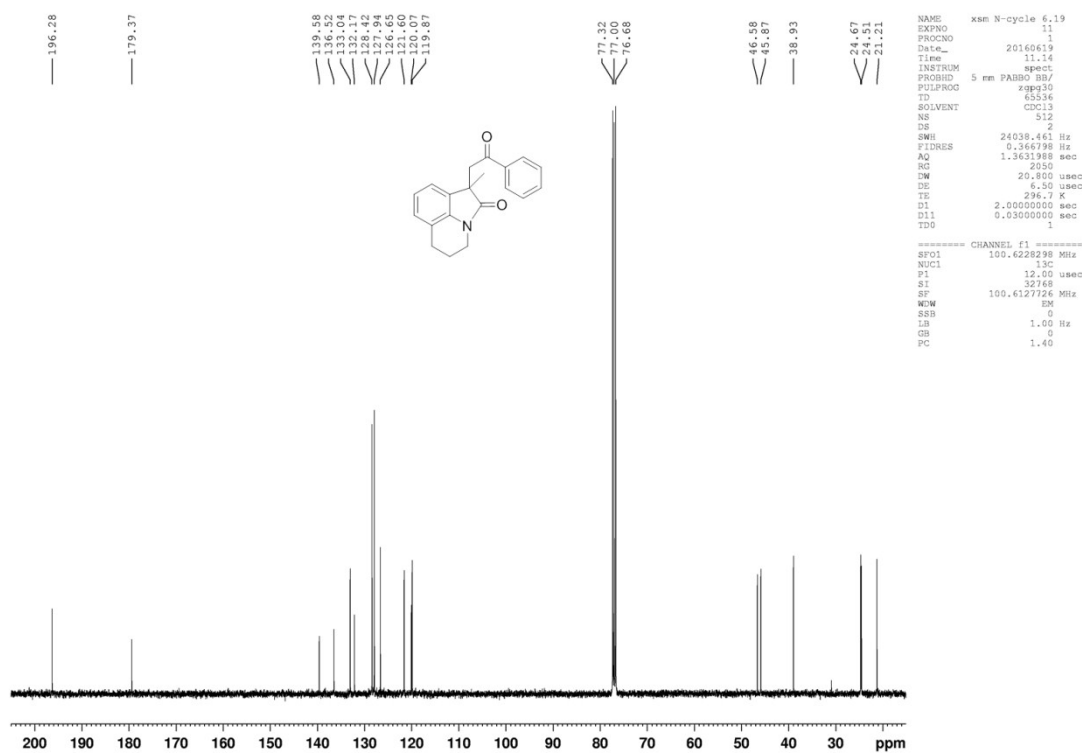

Supplement: c7qo00012j1.pdf [file c7qo00012j1.pdf]
